# Supplementary material for: Machine-learning-guided identification of protein secondary structures using spectral and structural descriptors
Source: Royal Society of Chemistry journal article supplement (doi:10.1039/d5bm00153f), 2025-01-01
Supplement: d5bm00153f1.pdf [file d5bm00153f1.pdf]

## Supporting Information

### **Machine-Learning-Guided Identification of Protein Secondary Structures Using Spectral and Structural Descriptors**

Ziqi Wang<sup>1</sup>, Kenry<sup>1,2,3,\*</sup>

<sup>1</sup>Department of Pharmacology and Toxicology, R. Ken Coit College of Pharmacy, University of Arizona, Tucson, AZ 85721, USA

<sup>2</sup>Clinical and Translational Oncology Program and Skin Cancer Institute, University of Arizona Cancer Center, University of Arizona, Tucson, AZ 85721, USA

<sup>3</sup>BIO5 Institute, University of Arizona, Tucson, AZ 85721, USA

\*Email: kenry@arizona.edu

## Supporting Figures

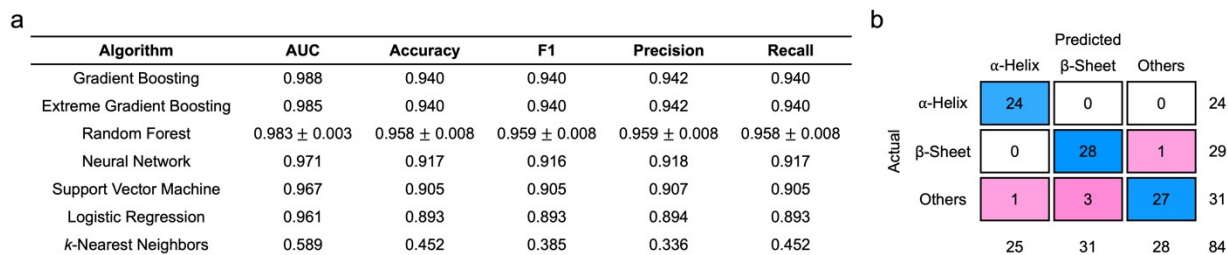

**Figure S1. Classification of protein secondary structures based on structural and molecular descriptors during classifier training.** (a) Comparison of the training performance of all supervised machine learning algorithms leveraging structural and molecular features.  $n = 2$  for random forest. (b) Confusion matrix of the best performing classifier (i.e., gradient boosting).

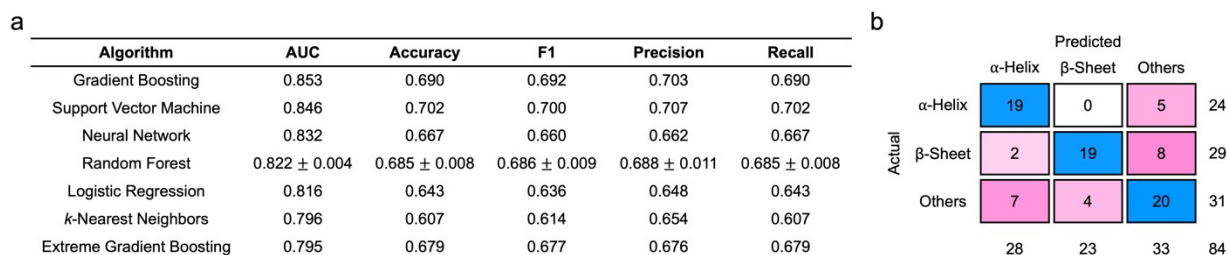

**Figure S2. Classification of protein secondary structures based on full spectral descriptors during classifier training.** (a) Comparison of the training performance of all supervised machine learning algorithms leveraging full spectral data.  $n = 2$  for random forest. (b) Confusion matrix of the best performing classifier (i.e., gradient boosting).

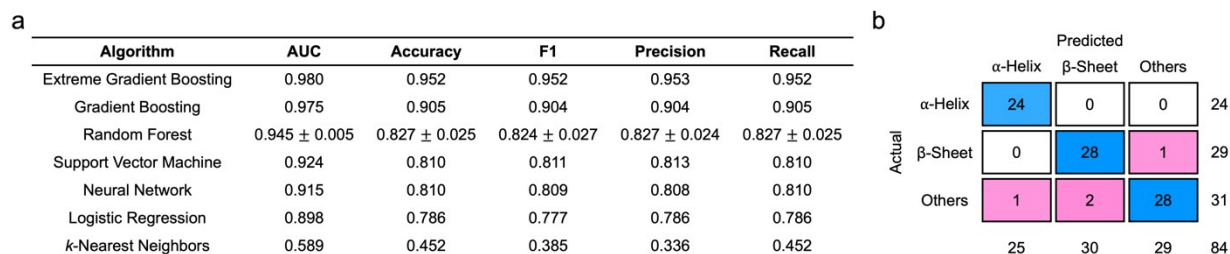

**Figure S3. Classification of protein secondary structures based on full spectral, structural, and molecular descriptors during classifier training.** (a) Comparison of the training performance of all supervised machine learning algorithms leveraging full spectral, structural, and molecular descriptors.  $n = 2$  for random forest. (b) Confusion matrix of the best performing classifier (i.e., extreme gradient boosting).

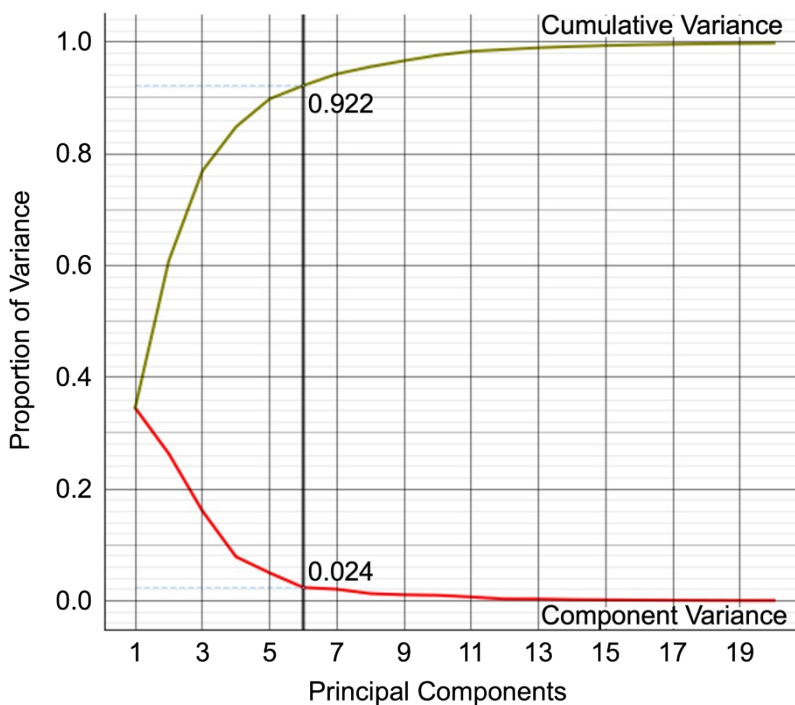

**Figure S4.** Proportion of spectral data variance as a function of the number of principal components.

a

| Algorithm                   | AUC           | Accuracy      | F1            | Precision     | Recall        |
|-----------------------------|---------------|---------------|---------------|---------------|---------------|
| Support Vector Machine      | 0.841         | 0.667         | 0.671         | 0.693         | 0.667         |
| Extreme Gradient Boosting   | 0.839         | 0.643         | 0.641         | 0.640         | 0.643         |
| Random Forest               | 0.833 ± 0.001 | 0.667 ± 0.017 | 0.667 ± 0.016 | 0.670 ± 0.012 | 0.667 ± 0.017 |
| Gradient Boosting           | 0.832         | 0.643         | 0.643         | 0.643         | 0.643         |
| Neural Network              | 0.825         | 0.726         | 0.728         | 0.738         | 0.726         |
| Logistic Regression         | 0.813         | 0.679         | 0.676         | 0.687         | 0.679         |
| <i>k</i> -Nearest Neighbors | 0.802         | 0.571         | 0.558         | 0.638         | 0.571         |

b

|        |                 | Predicted       |                |        |    |
|--------|-----------------|-----------------|----------------|--------|----|
|        |                 | $\alpha$ -Helix | $\beta$ -Sheet | Others |    |
| Actual | $\alpha$ -Helix | 18              | 0              | 6      | 24 |
|        | $\beta$ -Sheet  | 5               | 19             | 5      | 29 |
|        | Others          | 9               | 3              | 19     | 31 |
|        |                 | 32              | 22             | 30     | 84 |

**Figure S5. Classification of protein secondary structures based on dimensionally reduced spectral descriptors during classifier training.** (a) Comparison of the training performance of all supervised machine learning algorithms leveraging dimensionally reduced spectral data.  $n = 2$  for random forest. (b) Confusion matrix of the best performing classifier (i.e., support vector machine).

## Supporting Tables

**Table S1.** The different classifier hyperparameters and values considered in this study.

| Classifier                  | Hyperparameter                  | Value                                     |
|-----------------------------|---------------------------------|-------------------------------------------|
| Logistic Regression         | Regularization Strength         | Lasso, Ridge<br>1000, 200, 1, 0.02, 0.001 |
| Random Forest               | Number of trees                 | 5, 10, 50, 200                            |
| Gradient Boosting           | Number of trees                 | 5, 10, 50, 200                            |
|                             | Learning rate                   | 0.01, 0.1, 1                              |
|                             | Regularization                  | 0.0001, 0.01, 1, 100                      |
|                             | Limit depth of individual trees | 3, 6, 12                                  |
| Extreme Gradient Boosting   | Number of trees                 | 5, 10, 50, 200                            |
|                             | Learning rate                   | 0.01, 0.1, 1                              |
|                             | Regularization                  | 0.0001, 0.01, 1, 100                      |
|                             | Limit depth of individual trees | 3, 6, 12                                  |
| <i>k</i> -Nearest Neighbors | Number of neighbors             | 1, 3, 5, 10, 20                           |
|                             | Metric                          | Euclidean, Manhattan, Chebyshev           |
|                             | Weight                          | Uniform, Distance                         |
| Support Vector Machine      | Cost                            | 0.1, 1, 10, 100                           |
|                             | Regression loss epsilon         | 0.1, 1, 10, 50, 100                       |
|                             | Kernel                          | Linear, Polynomial, RBF, Sigmoid          |
|                             | Iteration limit                 | 10, 100, 10000                            |
| Neural Network              | Neurons in hidden layers        | 10, 100, 500                              |
|                             | Activation                      | ReLu, Identity, Logistic, tanh            |
|                             | Solver                          | Adam, SGD, L-BFGS-B                       |
|                             | Regularization                  | 0.0001, 0.01, 1, 100                      |
|                             | Maximal number of iterations    | 10, 200, 500                              |

**Table S2.** Optimized classifier hyperparameters during training based on structural and molecular descriptors.

| Classifier                  | Hyperparameter                  | Value     |
|-----------------------------|---------------------------------|-----------|
| Logistic Regression         | Regularization                  | Ridge     |
|                             | Strength                        | 200       |
| Random Forest               | Number of trees                 | 50        |
| Gradient Boosting           | Number of trees                 | 50        |
|                             | Learning rate                   | 0.01      |
|                             | Regularization                  | 0.01      |
|                             | Limit depth of individual trees | 12        |
| Extreme Gradient Boosting   | Number of trees                 | 5         |
|                             | Learning rate                   | 1         |
|                             | Regularization                  | 0.0001    |
|                             | Limit depth of individual trees | 3         |
| <i>k</i> -Nearest Neighbors | Number of neighbors             | 20        |
|                             | Metric                          | Euclidean |
|                             | Weight                          | Uniform   |
| Support Vector Machine      | Cost                            | 100       |
|                             | Regression loss epsilon         | 0.1       |
|                             | Kernel                          | RBF       |
|                             | Iteration limit                 | 10000     |
| Neural Network              | Neurons in hidden layers        | 10        |
|                             | Activation                      | ReLu      |
|                             | Solver                          | Adam      |
|                             | Regularization                  | 1         |
|                             | Maximal number of iterations    | 500       |

**Table S3.** Optimized classifier hyperparameters during training based on full spectral descriptors.

| Classifier                  | Hyperparameter                                                                                     | Value                          |
|-----------------------------|----------------------------------------------------------------------------------------------------|--------------------------------|
| Logistic Regression         | Regularization<br>Strength                                                                         | Ridge<br>1                     |
| Random Forest               | Number of trees                                                                                    | 200                            |
| Gradient Boosting           | Number of trees<br>Learning rate<br>Regularization<br>Limit depth of individual trees              | 10<br>0.1<br>0.01<br>6         |
| Extreme Gradient Boosting   | Number of trees<br>Learning rate<br>Regularization<br>Limit depth of individual trees              | 5<br>1<br>0.0001<br>6          |
| <i>k</i> -Nearest Neighbors | Number of neighbors<br>Metric<br>Weight                                                            | 5<br>Chebyshev<br>Distance     |
| Support Vector Machine      | Cost<br>Regression loss epsilon<br>Kernel<br>Iteration limit                                       | 1<br>10<br>RBF<br>100          |
| Neural Network              | Neurons in hidden layers<br>Activation<br>Solver<br>Regularization<br>Maximal number of iterations | 100<br>ReLu<br>SGD<br>1<br>500 |

**Table S4.** Optimized classifier hyperparameters during training based on full spectral, structural, and molecular descriptors.

| Classifier                  | Hyperparameter                  | Value     |
|-----------------------------|---------------------------------|-----------|
| Logistic Regression         | Regularization                  | Lasso     |
|                             | Strength                        | 1         |
| Random Forest               | Number of trees                 | 50        |
| Gradient Boosting           | Number of trees                 | 50        |
|                             | Learning rate                   | 0.1       |
|                             | Regularization                  | 100       |
|                             | Limit depth of individual trees | 3         |
| Extreme Gradient Boosting   | Number of trees                 | 50        |
|                             | Learning rate                   | 1         |
|                             | Regularization                  | 100       |
|                             | Limit depth of individual trees | 6         |
| <i>k</i> -Nearest Neighbors | Number of neighbors             | 20        |
|                             | Metric                          | Euclidean |
|                             | Weight                          | Uniform   |
| Support Vector Machine      | Cost                            | 100       |
|                             | Regression loss epsilon         | 50        |
|                             | Kernel                          | RBF       |
|                             | Iteration limit                 | 100       |
| Neural Network              | Neurons in hidden layers        | 500       |
|                             | Activation                      | Logistic  |
|                             | Solver                          | L-BFGS-B  |
|                             | Regularization                  | 1         |
|                             | Maximal number of iterations    | 200       |



**Table S5.** Optimized classifier hyperparameters during training based on dimensionally reduced spectral descriptors.

| Classifier                  | Hyperparameter                  | Value      |
|-----------------------------|---------------------------------|------------|
| Logistic Regression         | Regularization                  | Lasso      |
|                             | Strength                        | 200        |
| Random Forest               | Number of trees                 | 200        |
| Gradient Boosting           | Number of trees                 | 50         |
|                             | Learning rate                   | 0.1        |
|                             | Regularization                  | 0.01       |
|                             | Limit depth of individual trees | 3          |
| Extreme Gradient Boosting   | Number of trees                 | 200        |
|                             | Learning rate                   | 0.01       |
|                             | Regularization                  | 0.0001     |
|                             | Limit depth of individual trees | 12         |
| <i>k</i> -Nearest Neighbors | Number of neighbors             | 20         |
|                             | Metric                          | Chebyshev  |
|                             | Weight                          | Distance   |
| Support Vector Machine      | Cost                            | 10         |
|                             | Regression loss epsilon         | 50         |
|                             | Kernel                          | Polynomial |
|                             | Iteration limit                 | 10000      |
| Neural Network              | Neurons in hidden layers        | 10         |
|                             | Activation                      | tanh       |
|                             | Solver                          | Adam       |
|                             | Regularization                  | 0.0001     |
|                             | Maximal number of iterations    | 500        |
