# Supplementary material for: Machine-learning-guided identification of protein secondary structures using spectral and structural descriptors
Source: Royal Society of Chemistry journal article supplement (doi:10.1039/d5bm00153f), 2025-01-01
Supplement: d5bm00153f2.xlsx [file d5bm00153f2.xlsx]

## Sheet: Sheet1
No	Protein Name	Molecular Weight	Number of Residues	Mean Residue Weight	Alpha Helix	Beta Strand	Bonded Turn	Bend	Loop or Irregular	260	259	258	257	256	255	254	253	252	251	250	249	248	247	246	245	244	243	242	241	240	239	238	237	236	235	234	233	232	231	230	229	228	227	226	225	224	223	222	221
1	c-Phycocyanin	35677	334	107.1	0.741	0	0.091	0.04	0.109	0	0.000270482	0.000766572	0.00165163	0.00192747	0.00274947	0.00289529	0.00236347	0.00173482	0.00185394	0.000840585	0.00101241	0.000839702	0.00013918	-0.000787581	-0.00220012	-0.00479918	-0.0078447	-0.0121515	-0.0169314	-0.0227114	-0.0302094	-0.0394293	-0.0498983	-0.0627751	-0.0773803	-0.0939837	-0.111463	-0.130975	-0.150907	-0.171222	-0.191659	-0.211811	-0.229885	-0.246176	-0.260253	-0.270965	-0.279434	-0.285414	-0.288833
2	Calmodulin	16706	148	113.6	0.568	0.054	0.081	0.108	0.189	0	0.000888822	0.0075565	0.00777917	0.00366723	-0.00100108	-0.00111246	-0.00211322	0.00133301	0.00166653	0.0021113	0.00433538	0.00166648	-0.00378331	-0.00745422	-0.0117932	-0.0142416	-0.015244	-0.0201408	-0.0290441	-0.0347215	-0.046298	-0.05732	-0.069679	-0.0864921	-0.107093	-0.128698	-0.15476	-0.181718	-0.202109	-0.236312	-0.266065	-0.291478	-0.307763	-0.324495	-0.333543	-0.351839	-0.36089	-0.3588	-0.352252
3	Citrate synthase	48920	437	112.2	0.588	0.014	0.105	0.062	0.197	0	-0.000868987	-0.0002611	-0.00458069	-0.00475264	-0.00521748	-0.00740989	-0.0108751	-0.00979178	-0.0107836	-0.00792143	-0.00615453	-0.00718156	-0.0129571	-0.0157828	-0.0191563	-0.0220607	-0.0231286	-0.0235963	-0.0318354	-0.0391549	-0.0479279	-0.062258	-0.0732247	-0.0892829	-0.106614	-0.12325	-0.138911	-0.159801	-0.17993	-0.207121	-0.231664	-0.252191	-0.269696	-0.286735	-0.300305	-0.310614	-0.317365	-0.322971	-0.325882
4	Cytochrome C	11702	104	113.6	0.41	0	0.171	0.076	0.324	0	-0.00371465	-0.00573106	-0.0106492	-0.012292	-0.00850967	-0.00478723	-0.00762945	-0.0107268	-0.0105401	-0.00839299	-0.00523183	-0.00864995	-0.0137172	-0.0172053	-0.0193656	-0.0200696	-0.0214083	-0.0303626	-0.0318339	-0.0399747	-0.0535863	-0.0685444	-0.0846601	-0.108996	-0.129215	-0.159385	-0.195885	-0.234202	-0.270447	-0.316482	-0.359238	-0.400753	-0.437068	-0.468747	-0.486139	-0.500669	-0.506959	-0.505508	-0.50124
5	Hemoglobin	62016	572	108.6	0.689	0	0.093	0.021	0.119	0	0.000423785	0.00176413	0.0017397	0.00164485	0.00108079	0.00103338	0.000329846	-0.000513224	-0.000887085	-4.43071e-05	7.28151e-05	-0.000230637	-0.00153722	-0.00284197	-0.00384195	-0.00521316	-0.00783936	-0.0122064	-0.0175668	-0.0242204	-0.0317468	-0.0406313	-0.0511954	-0.064779	-0.0806818	-0.0998469	-0.122083	-0.146712	-0.172624	-0.19933	-0.224869	-0.248576	-0.271052	-0.291335	-0.307636	-0.321569	-0.331009	-0.336512	-0.338523
6	Human serum albumin	66472	585	113.8	0.689	0	0.097	0.056	0.126	0	0.00104583	0.00181388	0.00128513	-0.000331495	-0.000674307	-0.000327761	-0.00202799	-0.00341124	-0.00426769	-0.00421597	-0.00523935	-0.00625737	-0.00712619	-0.00783125	-0.00850363	-0.0105154	-0.0168296	-0.0228344	-0.0301811	-0.0390104	-0.0488416	-0.0615411	-0.0780732	-0.0924432	-0.109964	-0.131018	-0.151795	-0.17443	-0.199286	-0.221448	-0.244922	-0.269354	-0.288949	-0.307327	-0.323038	-0.331706	-0.340053	-0.345324	-0.346007
7	Insulin	5814	51	116.3	0.461	0.059	0.029	0.039	0.275	0	-0.000159009	0.000489088	0.00206975	0.00280117	0.00319713	0.00329991	0.00228719	0.00196975	0.00294623	0.00318576	0.00348028	0.00329686	0.000859161	-0.00208011	-0.00444948	-0.00886558	-0.01296	-0.018143	-0.024165	-0.032243	-0.0408985	-0.0527565	-0.064996	-0.0789402	-0.0938081	-0.111405	-0.128417	-0.147855	-0.166083	-0.185424	-0.20479	-0.224169	-0.241046	-0.255577	-0.266017	-0.273719	-0.277347	-0.278153	-0.276684
8	Leptin	16026	146	110.5	0.562	0	0.034	0.048	0.295	0	0.0177408	0.0220496	0.0206182	0.0206978	0.00632924	0.00806761	0.00912606	-0.0010244	-0.00102982	0.00836491	0.00912197	0.0158736	0.0169381	0.00471451	-0.00151802	0.00410061	-0.000844876	-0.00936987	-0.00549767	-0.0177625	-0.0359027	-0.043848	-0.0711623	-0.0907216	-0.100378	-0.119127	-0.141481	-0.164159	-0.19343	-0.21852	-0.241642	-0.266315	-0.286491	-0.303469	-0.314866	-0.314392	-0.315221	-0.317509	-0.316574
9	Lysozyme	14313	129	111.8	0.302	0.062	0.24	0.093	0.155	0	0.00254287	0.00297813	0.00101422	-0.00113469	-0.0024865	-0.00394556	-0.0060394	-0.007467	-0.00813453	-0.00865119	-0.00861873	-0.0106027	-0.011854	-0.0141764	-0.0160848	-0.018614	-0.0205619	-0.0256442	-0.0317171	-0.0398618	-0.0517011	-0.0656202	-0.0815481	-0.0992711	-0.12174	-0.147082	-0.175519	-0.204843	-0.231275	-0.250502	-0.264932	-0.275893	-0.286572	-0.297095	-0.307321	-0.317145	-0.324174	-0.33003	-0.334463
10	Myoglobin	16952	153	111.5	0.739	0	0.131	0.02	0.111	0	9.17253e-05	-0.000617488	0.00295607	0.00277112	0.00526804	0.00517601	0.00468303	0.00125932	0.000394999	-0.000963459	-0.000593931	-0.00337345	-0.00322046	-0.005106	-0.00600376	-0.00906498	-0.0106749	-0.0181902	-0.0257708	-0.032736	-0.0430764	-0.0564843	-0.0666797	-0.0816155	-0.0975799	-0.114759	-0.138233	-0.164104	-0.19135	-0.216903	-0.239924	-0.259234	-0.27787	-0.292854	-0.305765	-0.314801	-0.320615	-0.322176	-0.322339
11	Peroxidase C1	33919	308	110.5	0.448	0.019	0.166	0.11	0.185	0	-0.00216234	-0.00206147	-0.000404942	0.00231495	0.00362568	0.00242891	0.00234903	0.00138121	0.0049796	0.0046785	0.003576	-0.00127172	-0.00395667	-0.00604087	-0.00659185	-0.00862778	-0.0117835	-0.0191351	-0.0260694	-0.034234	-0.0454988	-0.0559312	-0.0699867	-0.08662	-0.107541	-0.128695	-0.151769	-0.172159	-0.193895	-0.217012	-0.241336	-0.262382	-0.279568	-0.291795	-0.300803	-0.310397	-0.318131	-0.324033	-0.327364
12	Phospholipase A2	13799	123	113.1	0.447	0.065	0.163	0.057	0.195	0	0.00455856	0.00601261	0.00636623	0.000392178	0.00164267	0.00298607	0.0138973	0.0151163	0.00709468	0.000503852	-0.000156878	0.00479393	0.00852513	0.00547855	-0.00372942	-0.0147536	-0.0171411	-0.017477	-0.0265009	-0.0433252	-0.0652589	-0.0869733	-0.108739	-0.136127	-0.163528	-0.195336	-0.225639	-0.250172	-0.282219	-0.311633	-0.336824	-0.36025	-0.379922	-0.392804	-0.401403	-0.402294	-0.400905	-0.401836	-0.400321
13	Ammonia channel	42301.8	406	104.4	0.597	0.009	0.08	0.052	0.229	0	-0.000202199	-0.00293802	-0.00218896	-0.00170686	-0.00052603	-0.00116431	-0.00126146	-0.00182923	-0.00163927	-0.0034901	-0.00378372	-0.00897934	-0.012861	-0.0174522	-0.0231387	-0.0262288	-0.0281561	-0.034248	-0.0376289	-0.043605	-0.0555203	-0.0694983	-0.0857091	-0.102685	-0.117616	-0.135943	-0.156222	-0.175494	-0.189503	-0.204449	-0.218079	-0.235739	-0.256091	-0.270272	-0.279562	-0.287317	-0.292693	-0.298208	-0.305284
14	Bacteriorhodopsin	26915.6	249	108.5	0.685	0.048	0.085	0.032	0.137	0	0.00191114	0.00160473	0.000609199	0.000320046	0.000627787	0.00207924	0.00108386	-0.000677842	0.000938336	0.00345034	0.00368247	-0.000888923	-0.00878963	-0.0145153	-0.0163612	-0.0170498	-0.0193028	-0.0243622	-0.0333079	-0.0433899	-0.0539948	-0.0667743	-0.0819638	-0.1	-0.119117	-0.139125	-0.160214	-0.180216	-0.200408	-0.222127	-0.243195	-0.261428	-0.275211	-0.28494	-0.292995	-0.29857	-0.298257	-0.29344	-0.286124
15	Vitamin B12 import system permease	62012.4	575	108	0.552	0.059	0.09	0.061	0.205	0	0.00266224	0.00679746	0.00755015	0.00528822	0.00242656	0.00333692	0.00478209	0.00508736	0.00546297	0.00385552	0.000125119	-0.000732727	-0.00545472	-0.0111645	-0.0127419	-0.0133007	-0.0194032	-0.0261317	-0.036383	-0.0489539	-0.0584928	-0.0684508	-0.0830165	-0.0959787	-0.110725	-0.126862	-0.142943	-0.158488	-0.177329	-0.192795	-0.211843	-0.229559	-0.248777	-0.264035	-0.278436	-0.289576	-0.294648	-0.301857	-0.309773
16	ClC-ec1	50348.7	473	106.7	0.625	0	0.121	0.063	0.167	0	3.76124e-05	-0.00122486	-0.00120033	0.000171709	0.000831562	0.00122813	0.00140392	0.00104007	0.000280458	-0.000546198	-0.00307686	-0.00550531	-0.00828536	-0.0098798	-0.0120875	-0.0157261	-0.0198553	-0.0249248	-0.0313843	-0.0386615	-0.0485552	-0.0608201	-0.0743115	-0.0894383	-0.106609	-0.125415	-0.147083	-0.169978	-0.194917	-0.220264	-0.243159	-0.260738	-0.275047	-0.285268	-0.293854	-0.299986	-0.300804	-0.298351	-0.293854
17	Cytochrome bc1	241085	2168	111.3	0.44	0	0.1	0.082	0.245	0	-0.000434862	-0.000613157	-0.000701348	0.000359544	0.0025233	0.00315074	0.0013833	3.23919e-06	-0.00129493	-0.0019776	-0.00161422	-0.00108414	-0.000536636	-0.000417749	-0.00399877	-0.0103917	-0.0160453	-0.022786	-0.0316088	-0.0422026	-0.0564266	-0.073102	-0.0892845	-0.104461	-0.121491	-0.142671	-0.169297	-0.197962	-0.224108	-0.246534	-0.267465	-0.289607	-0.309912	-0.327492	-0.341941	-0.351044	-0.35647	-0.35962	-0.361526
18	Cytochrome C oxidase	408982	3614	113.2	0.544	0.051	0.093	0.075	0.202	0	-0.00563988	-0.0102433	-0.0107528	-0.00778876	-0.00367142	-0.00176817	-0.00230911	-0.00382615	-0.00530641	-0.00834075	-0.0134292	-0.0168551	-0.0159575	-0.0130488	-0.0123426	-0.0172059	-0.0259654	-0.0325693	-0.0357612	-0.0411831	-0.0502233	-0.0616354	-0.0749417	-0.0884121	-0.102581	-0.118584	-0.135087	-0.152574	-0.1756	-0.201429	-0.223225	-0.243269	-0.261395	-0.27694	-0.292699	-0.302814	-0.306775	-0.310343	-0.312721
19	Rhomboid protease glpG	21657.4	192	113.4	0.617	0	0.107	0.077	0.158	0	-0.000442442	-0.00256043	-0.00500485	-0.00661848	-0.00670903	-0.00323239	-0.00115545	0.00190135	0.00279181	0.00456989	0.00352319	-0.00124876	-0.00507546	-0.0107626	-0.0132871	-0.0140408	-0.015529	-0.019804	-0.0230336	-0.0327855	-0.0384579	-0.0462258	-0.0613449	-0.0728689	-0.0863733	-0.100507	-0.115775	-0.131841	-0.154261	-0.171161	-0.193722	-0.212016	-0.234015	-0.25102	-0.264122	-0.275054	-0.285577	-0.29172	-0.295754
20	Voltage-gated potassium channel	17693.6	160	111.3	0.534	0	0.106	0.048	0.312	0	-0.00199609	-0.00301333	-0.00458641	-0.0047074	-0.00566622	-0.00524227	-0.00511248	-0.0039027	-0.00327383	-0.00263145	-0.00351584	-0.00575686	-0.00936347	-0.0113246	-0.0136829	-0.0161614	-0.0186517	-0.0226442	-0.0283192	-0.0346606	-0.0429378	-0.0520121	-0.062284	-0.0745591	-0.0876933	-0.103109	-0.119648	-0.137085	-0.15587	-0.17613	-0.195561	-0.21475	-0.232061	-0.246152	-0.258476	-0.268509	-0.274783	-0.278825	-0.281485
21	Lactose permease	46503.2	417	111.8	0.676	0	0.139	0.091	0.086	0	0.000987589	0.00079973	0.00198159	0.00253433	0.00419016	0.00294047	0.0032115	0.00397662	0.00511435	0.00456672	0.00182436	-0.00192659	-0.00523907	-0.00812428	-0.0108806	-0.0146795	-0.0215306	-0.0289189	-0.0361982	-0.0452226	-0.0562246	-0.0671126	-0.0827146	-0.100809	-0.119669	-0.141181	-0.163496	-0.183515	-0.206334	-0.229281	-0.252515	-0.271728	-0.287529	-0.297604	-0.305452	-0.311751	-0.315968	-0.314296	-0.312376
22	Na(+):neurotransmitter symporter	57408.1	513	112.1	0.73	0.008	0.106	0.048	0.104	0	-0.000347253	0.000418342	-0.000904556	-0.00368913	-0.00474001	-0.00301321	-0.00475552	-0.00346377	-0.00335175	-0.00503582	-0.0062316	-0.00598095	-0.00896692	-0.0112741	-0.0137495	-0.0173718	-0.0224399	-0.0290459	-0.0376065	-0.0471235	-0.0577276	-0.0705553	-0.0840631	-0.100379	-0.117731	-0.137205	-0.156817	-0.179643	-0.199684	-0.219818	-0.236923	-0.249698	-0.259529	-0.270587	-0.277407	-0.281102	-0.2825	-0.27916	-0.276874
23	Light harvesting protein	10189.9	94	109.6	0.691	0	0.053	0.043	0.181	0	0.00148329	0.00213827	0.00274963	0.00418951	0.00388542	0.00135755	0.00100965	-0.00103896	-0.0031313	-0.00356654	-0.00596437	-0.00792627	-0.0113712	-0.014293	-0.0168224	-0.0193956	-0.0233649	-0.0321766	-0.0438244	-0.054906	-0.0638944	-0.0729267	-0.0801709	-0.0954443	-0.112289	-0.126605	-0.139001	-0.151485	-0.163316	-0.180821	-0.197061	-0.212648	-0.227582	-0.242516	-0.258019	-0.272519	-0.282131	-0.286069	-0.287388
24	Large-conductance mechanosensitive channel	16023.4	151	106.8	0.528	0.034	0.036	0.013	0.39	0	-0.000415234	-0.0018436	-0.00132974	0.000618682	0.00237494	0.00188851	-9.28521e-05	-0.000780989	0.000515715	0.0018537	0.000971518	-0.00195314	-0.00444583	-0.00592064	-0.00779894	-0.0107559	-0.0163026	-0.0231696	-0.0297728	-0.0373874	-0.0477996	-0.0614265	-0.0778921	-0.096269	-0.115707	-0.13654	-0.159562	-0.183893	-0.208671	-0.232759	-0.253837	-0.271842	-0.287127	-0.299756	-0.311246	-0.320416	-0.325538	-0.327403	-0.325291
25	Sensory rhodopsin-2	81959.3	773	106.3	0.807	0.014	0.084	0.025	0.07	0	-0.000171821	0.0013173	0.0013173	0.00126002	6.30011e-05	-0.000715922	-0.00383734	-0.0037457	-0.00316151	-0.00281787	-0.0032646	-0.00286942	-0.00206758	-0.0021764	-0.00279496	-0.00694731	-0.0135166	-0.0195304	-0.0227377	-0.0286369	-0.0350515	-0.0447881	-0.0558992	-0.0699313	-0.0831042	-0.0985682	-0.11575	-0.134078	-0.15126	-0.168442	-0.187915	-0.208534	-0.22858	-0.245762	-0.260653	-0.269817	-0.278981	-0.283562	-0.288144
26	Reaction centre protein	93702.6	848	110.9	0.45	0.078	0.121	0.085	0.211	0	-0.00113024	-0.00327544	-0.00475963	-0.00399775	-0.00341791	-0.00466526	-0.0054667	-0.00632821	-0.00753687	-0.00728045	-0.0078135	-0.00967421	-0.0109363	-0.0130383	-0.0149292	-0.0183974	-0.0236249	-0.0315508	-0.0387328	-0.0465165	-0.053488	-0.0641772	-0.0748979	-0.0903025	-0.105656	-0.122755	-0.142622	-0.165177	-0.187406	-0.213143	-0.242052	-0.27004	-0.298111	-0.319831	-0.337728	-0.348442	-0.356109	-0.359032	-0.359732
27	Photosynthetic reaction centre	132200	1190	111.2	0.402	0.059	0.12	0.094	0.22	0	-0.000414314	-0.00171986	-0.00239548	-0.000586249	0.00170908	0.000181012	-0.000671721	-0.00370575	-0.0020312	0.00107676	0.00436259	0.00225865	-0.000231016	-0.00613358	-0.0123926	-0.0138683	-0.0148693	-0.0208111	-0.026145	-0.0310033	-0.0430091	-0.0519557	-0.0629151	-0.0787779	-0.0947292	-0.111099	-0.131132	-0.150655	-0.176196	-0.208575	-0.240667	-0.272509	-0.299311	-0.323256	-0.344113	-0.357312	-0.362822	-0.365858	-0.363452
28	Rhodopsin (dark)	39007.7	348	112.4	0.57	0.034	0.092	0.064	0.209	0	0.000457422	0.00136558	0.00211677	0.00230771	0.0012136	0.00042313	-0.00038272	-0.000846896	-0.00160896	-0.00229017	-0.00310231	-0.00415213	-0.0057355	-0.00801855	-0.010237	-0.0129968	-0.0169582	-0.0216072	-0.0282296	-0.0359531	-0.0439877	-0.0531328	-0.0636495	-0.0765608	-0.0910509	-0.106666	-0.122735	-0.140431	-0.159613	-0.181934	-0.204589	-0.226068	-0.244888	-0.261307	-0.274459	-0.284345	-0.292109	-0.29824	-0.302015
29	Preprotein translocase subunit secY	61805.3	563	110	0.561	0.021	0.078	0.064	0.258	0	-0.00172136	-0.00261609	-0.0034194	-0.00336139	-0.00277955	-0.00254581	-0.00160948	0.000844541	0.0010023	-0.000331712	-0.00392665	-0.0068772	-0.00962651	-0.0110449	-0.0133093	-0.0173668	-0.0226702	-0.0272046	-0.0337439	-0.0406935	-0.0488731	-0.0587521	-0.0690539	-0.0816182	-0.0970675	-0.113754	-0.132063	-0.15121	-0.169389	-0.186963	-0.204971	-0.222193	-0.239527	-0.25683	-0.272041	-0.282669	-0.292108	-0.298887	-0.301426
30	Succinate dehydrogenase	118304	1070	111.1	0.431	0	0.099	0.097	0.219	0	0.000624783	-0.000535442	0.000605949	0.0014392	-9.98099e-05	-0.00205033	-0.00252614	-0.00281325	-0.00263095	-0.00280564	-0.00600337	-0.00802503	-0.00869905	-0.00876118	-0.0115985	-0.0151811	-0.0206367	-0.0258191	-0.0308241	-0.0388733	-0.0487126	-0.0613978	-0.0772133	-0.0942025	-0.112523	-0.13352	-0.154543	-0.179409	-0.20393	-0.22662	-0.249114	-0.268846	-0.288496	-0.305653	-0.318891	-0.327617	-0.332238	-0.332345	-0.334092
31	Calexcitin	22271	191	117.2	0.584	0.021	0.118	0.047	0.183	0	0.0114127	0.016188	0.0171927	0.0111923	0.00822201	0.00286433	0.00764375	0.00430831	0.0052559	0.00538458	0.0116239	0.00898852	0.00309243	0.00315941	0.00832794	0.0113209	0.00119113	-0.00527682	-0.0188717	-0.0220153	-0.0229731	-0.0324797	-0.0607165	-0.0747598	-0.0887702	-0.103296	-0.123749	-0.145257	-0.168996	-0.179544	-0.196723	-0.215764	-0.239253	-0.2522	-0.258841	-0.265122	-0.280527	-0.288153	-0.283729
32	Alpha bungarotoxin	7994	74	109.5	0.046	0.368	0.161	0.109	0.316	0	0.00208824	0.00493621	0.00911374	0.0148111	0.0260162	0.0250716	0.0256461	0.0286901	0.0319251	0.0325007	0.0395379	0.0353632	0.0353695	0.0368968	0.0376638	0.0429952	0.0475675	0.0496682	0.0565258	0.0630048	0.0639669	0.0693072	0.0719835	0.0748512	0.084575	0.103254	0.120223	0.131482	0.130169	0.117992	0.090565	0.0593169	0.0189084	-0.0382923	-0.103901	-0.175061	-0.248531	-0.314963	-0.372255
33	Alpha chymotrypsin	25244	241	105.2	0.091	0.32	0.122	0.114	0.301	0	0.000293142	0.000302483	0.00106316	0.00205965	0.00129348	0.00100694	0.00057612	-0.000200802	-0.00294951	-0.00381147	-0.00567539	-0.00667121	-0.00688331	-0.00889406	-0.0141751	-0.0173549	-0.0208898	-0.0263263	-0.0322625	-0.0396537	-0.0483256	-0.0573534	-0.0670214	-0.082656	-0.109257	-0.14807	-0.198811	-0.251754	-0.291347	-0.307132	-0.306713	-0.297199	-0.291225	-0.292153	-0.297474	-0.305085	-0.315076	-0.329462	-0.346304
34	Alpha chymotrypsinogen	25666	245	105.2	0.073	0.32	0.149	0.094	0.271	0	0.00200367	0.00914057	0.00193325	0.00307507	-0.0019447	-0.00580135	-0.00550327	0.00217721	-0.000274473	0.00405756	-0.00118209	-0.00752873	-0.0111763	-0.00892451	-0.0117874	-0.00901832	-0.0093091	-0.0145707	-0.0225835	-0.0315833	-0.0385006	-0.0403239	-0.0361293	-0.0406509	-0.0520656	-0.073059	-0.103436	-0.138593	-0.162589	-0.174568	-0.170046	-0.162992	-0.161466	-0.175714	-0.195002	-0.217572	-0.249026	-0.286725	-0.3297
35	Avidin	14344	128	112.9	0	0.492	0.039	0.134	0.264	0	-0.00219183	-0.00441217	-0.000326998	-0.00192123	0.000451422	-0.00380261	-0.00689821	-0.0124834	-0.00934533	-0.00845597	-0.0101382	-0.0144873	-0.0153129	-0.0146489	-0.00894846	-0.00431226	-0.00223964	-0.000876182	0.00350289	0.0118347	0.0223495	0.0384812	0.063315	0.0999648	0.150454	0.206756	0.268197	0.315558	0.347237	0.361347	0.366906	0.360084	0.351509	0.327476	0.29462	0.253066	0.209553	0.162729	0.115124
36	Beta galactosidase	116353	1023	113.8	0.103	0.364	0.113	0.114	0.245	0	0.00261997	0.00327814	0.00390761	0.0020394	0.00189134	0.0040574	0.00729027	0.00972833	0.0131164	0.0122736	0.0128917	0.0124826	0.00652524	0.00579524	0.00715347	0.0052639	0.00275751	0.00466186	0.00208267	0.00341292	-0.000163649	-0.00525563	-0.0141238	-0.019449	-0.0236748	-0.0266301	-0.0311245	-0.0452221	-0.0630297	-0.0886397	-0.117998	-0.155451	-0.188415	-0.221917	-0.251972	-0.280079	-0.304948	-0.337954	-0.36152
37	Beta lactoglobulin	18281	162	113.5	0.08	0.42	0.074	0.148	0.216	0	-0.00318572	-0.00341358	-0.00182044	-0.000226817	-0.000454338	0.00159543	0.000684801	-0.00330145	-0.00580793	-0.00808731	-0.0116208	-0.0133319	-0.0140176	-0.0172116	-0.0208626	-0.0274796	-0.0358094	-0.0468795	-0.0577246	-0.0676601	-0.0809085	-0.0935896	-0.105133	-0.120219	-0.128573	-0.136586	-0.148828	-0.157989	-0.173781	-0.189004	-0.20389	-0.219923	-0.241678	-0.262524	-0.285891	-0.303776	-0.322125	-0.335786	-0.35197
38	Catalase	59625	526	113.6	0.288	0.167	0.134	0.12	0.228	0	0.000112584	-0.00129537	-0.00281599	-0.005632	-0.00602635	-0.00664603	-0.00625194	-0.00698426	-0.00861772	-0.0110398	-0.0123355	-0.0152646	-0.0193767	-0.0240522	-0.0267563	-0.0292352	-0.0326154	-0.0403331	-0.0523885	-0.0645572	-0.0748107	-0.0848393	-0.0979663	-0.114305	-0.136954	-0.161125	-0.18924	-0.217243	-0.245416	-0.272632	-0.296863	-0.3207	-0.340312	-0.359023	-0.373621	-0.383208	-0.386479	-0.389474	-0.386154
39	Ceruloplasmin	120087	1046	114.9	0.084	0.334	0.139	0.108	0.28	0	0.01044	0.00914964	0.00445747	-0.00269788	-0.00891478	-0.00950114	0.00398817	0.00797626	0.00563029	0.00152491	-0.00234579	-0.0111427	-0.0113773	-0.0152478	-0.0256865	-0.0338964	-0.0446869	-0.0531311	-0.0592297	-0.0665009	-0.0696669	-0.0764689	-0.0840914	-0.095819	-0.115522	-0.143081	-0.174863	-0.20594	-0.239128	-0.279235	-0.321452	-0.371409	-0.429339	-0.475894	-0.528192	-0.576501	-0.615078	-0.644275	-0.659984
40	Concanavalin A	25658	237	108.7	0	0.46	0.118	0.135	0.241	0	-0.00194512	-0.00522871	-0.00735829	-0.00517005	-0.00590119	-0.00371168	-0.00499066	-0.00511343	-0.00377482	-0.0054201	-0.00999032	-0.0102362	-0.0128591	-0.0137153	-0.0137183	-0.0179294	-0.0231793	-0.0277605	-0.0339303	-0.0402859	-0.0462782	-0.0542884	-0.0621185	-0.0727013	-0.0842667	-0.0970597	-0.117439	-0.142475	-0.171312	-0.203101	-0.231414	-0.257231	-0.283487	-0.304244	-0.318764	-0.326735	-0.327236	-0.320873	-0.311075
41	Gamma-B crystallin	20965	174	121.18	0.029	0.46	0.08	0.121	0.224	0	-3.57381e-05	0.00371749	0.00652615	0.00849839	0.0051641	0.000677413	-0.0035436	-0.00491874	-0.00365483	-0.00421353	-0.00629174	-0.00820218	-0.00324593	0.000563171	0.00193918	0.00139912	0.00125246	-0.000360724	0.00288056	0.00813589	0.0121355	0.0149885	0.0213737	0.0239359	0.0181339	0.0130222	0.00319112	-0.010048	-0.0180169	-0.0327168	-0.0534354	-0.0751186	-0.0986264	-0.123685	-0.147226	-0.172216	-0.193251	-0.207488	-0.221084
42	Gamma-D crystallin	20735	173	120.6	0.026	0.454	0.081	0.156	0.197	0	0.000205174	-0.00179359	-0.0014163	-0.00665074	-0.00508528	-0.00343696	-0.00679617	-0.0124707	-0.0121381	-0.0161484	-0.0137771	-0.0139549	-0.010488	-0.0118288	-0.0168292	-0.0221922	-0.021024	-0.0169896	-0.00780166	-0.00288667	-0.00946472	-0.0138447	-0.0140643	-0.00938941	-0.00389914	-0.00649742	-0.0228471	-0.0411447	-0.064139	-0.0862799	-0.109594	-0.13638	-0.16147	-0.190613	-0.21705	-0.242005	-0.273023	-0.299254	-0.319539
43	Gamma-E-crystallin	20955	173	121.8	0	0.434	0.098	0.145	0.249	0	-0.00236234	-0.00357056	-0.00773277	-0.011954	-0.0115472	-0.00675968	-0.0050475	-0.00295826	-0.00365141	-0.0037483	-0.000173571	0.00203244	0.00368706	0.00622917	0.000197841	-0.00624921	-0.00417396	-0.000831906	0.00590989	0.0154454	0.0150457	0.0187585	0.0256331	0.0362746	0.0499537	0.062053	0.0629886	0.0609931	0.0511336	0.03186	0.0139863	-0.00926437	-0.0425914	-0.0793247	-0.112379	-0.146761	-0.179363	-0.207537	-0.239008
44	Gamma-s-crystallin C terminus	10414	87	121.1	0.057	0.448	0.063	0.144	0.201	0	0.00499803	0.00720464	0.00415848	0.00519471	0.00289639	0.00573847	0.00206375	-6.55902e-06	-0.00556184	-0.012886	-0.0190915	-0.019109	-0.0189651	-0.00919536	-0.00295837	-0.00226698	0.000132872	-0.0077531	-0.0121058	-0.00920824	-0.00738141	-0.0104424	-0.00820065	-0.0187318	-0.0327623	-0.0436645	-0.0604817	-0.079056	-0.0955078	-0.11924	-0.14599	-0.175158	-0.206599	-0.241237	-0.286048	-0.333791	-0.377569	-0.409718	-0.434937
45	Elastase	25900	240	108.4	0.054	0.304	0.138	0.054	0.392	0	-0.00911719	-0.00770015	-0.0034334	0.0116631	0.018786	0.0127986	0.00623836	-0.00716957	-0.0128813	-0.0131744	-0.0148949	-0.0174718	-0.015482	-0.0246289	-0.0297808	-0.0306494	-0.0372335	-0.0346742	-0.0404046	-0.0541442	-0.0627413	-0.0596133	-0.0647817	-0.0668042	-0.0768433	-0.0911814	-0.0892016	-0.0657369	-0.0482786	-0.0439953	-0.0574821	-0.0887505	-0.118886	-0.138708	-0.157678	-0.164317	-0.179858	-0.204016	-0.239097
46	Immunoglobulin G	72624	658	110.5	0.04	0.442	0.101	0.086	0.28	0	-0.000469166	5.04815e-05	-0.00171713	0.00625094	0.00742728	0.00828039	0.0151869	0.0126815	0.00484659	-0.000141496	-0.00249305	0.00154202	0.00206042	0.000457195	-0.00599854	-0.0114896	-0.00698134	-0.00641724	-0.00790619	-0.010704	-0.0117772	-0.0106796	-0.00208538	0.00164094	-0.00461353	-0.0224385	-0.0436697	-0.0673619	-0.0844114	-0.0958056	-0.110791	-0.127352	-0.151491	-0.180957	-0.221725	-0.2641	-0.304412	-0.353767	-0.395603
47	Jacalin	14663	133	111.1	0	0.626	0.056	0.088	0.224	0	0.000450209	-0.000749497	0.00285121	0.00435224	0.00765438	0.00540438	0.0015028	0.00225383	0.00585758	0.0120148	0.0168221	0.0186268	0.0145736	0.0135241	0.0163808	0.0208909	0.0231481	0.0282615	0.027213	0.0260139	0.0246642	0.0195547	0.0133912	0.0115881	0.00226302	-0.00691398	-0.0201559	-0.0425811	-0.0687744	-0.0949741	-0.128858	-0.160492	-0.185208	-0.206163	-0.225317	-0.242517	-0.266803	-0.291697	-0.310871
48	Lectin (lentil)	25469	232	110.3	0.017	0.47	0.107	0.116	0.251	0	-0.00218266	-0.00224714	-0.0029111	-0.00311857	-0.00325007	-0.00247552	-0.00339138	-0.00218232	-0.00255335	-0.00342542	-0.00579633	-0.0071428	-0.00986317	-0.0100161	-0.0108358	-0.0097635	-0.00978836	-0.0140524	-0.0197164	-0.022178	-0.026796	-0.0349826	-0.0467096	-0.0625839	-0.0828733	-0.103059	-0.126287	-0.149197	-0.167029	-0.180002	-0.189642	-0.19708	-0.200858	-0.201204	-0.198984	-0.197902	-0.196417	-0.195325	-0.189716
49	Lectin (pea)	26846	245	109.6	0.009	0.464	0.117	0.106	0.264	0	0.00134198	0.00220363	0.00177827	-0.000279877	-0.00279049	-0.00327027	-0.000965907	-0.000472058	-0.00122569	-0.000950912	-0.000997767	-0.0031124	-0.00349619	-0.00645917	-0.0103604	-0.013168	-0.0149164	-0.0182528	-0.0223188	-0.0280133	-0.0382131	-0.0509461	-0.0654506	-0.0855658	-0.108494	-0.135847	-0.169362	-0.196631	-0.215882	-0.227138	-0.228801	-0.229334	-0.23361	-0.234942	-0.232085	-0.226386	-0.2196	-0.212241	-0.209798
50	Pectate lyase C	37697	353	107.1	0.088	0.32	0.079	0.178	0.272	0	-0.000696356	-0.000669845	-0.00222622	-0.00518286	-0.00475736	-0.00506142	-0.00621106	-0.00604971	-0.00672496	-0.00907375	-0.0115111	-0.0151234	-0.0192698	-0.022712	-0.0267832	-0.0325185	-0.040412	-0.0496818	-0.0613678	-0.0746542	-0.0887835	-0.103885	-0.12106	-0.139811	-0.161354	-0.187067	-0.216249	-0.247567	-0.279745	-0.308139	-0.333099	-0.354962	-0.373303	-0.389217	-0.402766	-0.415291	-0.428062	-0.439375	-0.449967
51	Pepsinogen	39533	370	107.1	0.07	0.362	0.105	0.081	0.292	0	0.00314877	0.00406857	0.0067603	0.00262812	0.000528996	0.00203995	0.00433958	0.00414424	0.00690527	0.00539614	0.00802718	0.00507132	0.00388963	0.00126042	-5.42315e-05	-0.00498841	-0.00150061	0.00251536	0.0030434	0.00106912	-0.00103776	-0.00630808	-0.0128987	-0.0140213	-0.0185727	-0.0227305	-0.0273517	-0.0326346	-0.0433309	-0.0593781	-0.084542	-0.120084	-0.164359	-0.210437	-0.258716	-0.304968	-0.349322	-0.393562	-0.434516
52	Rubredoxin	6048	54	114.1	0	0.148	0.259	0.019	0.333	0	5.80785e-05	0.00216044	0.00397055	0.0057221	0.00659751	0.00653855	0.0047861	0.0043768	0.00484341	0.0047845	0.00460881	0.00361584	0.00122188	-0.00362353	-0.00695085	-0.00916885	-0.0110364	-0.0136042	-0.017339	-0.0257419	-0.0331521	-0.0421372	-0.0566061	-0.0775502	-0.104269	-0.137227	-0.171116	-0.206168	-0.242558	-0.276787	-0.309729	-0.333803	-0.350002	-0.359258	-0.36035	-0.352577	-0.338625	-0.314935	-0.284195
53	Trypsin inhibitor A	20095	181	111.6	0	0.334	0.11	0.099	0.378	0	0.00198262	0.00251263	0.00328947	0.00470947	0.00341022	0.00358082	0.00325252	0.00434985	0.00710757	0.0102591	0.00934292	0.00800159	0.00463445	0.00505482	0.00438864	0.00418867	0.0028834	0.00135354	0.00281929	0.00620748	0.00677308	0.00870496	0.010308	0.010791	0.013294	0.0139256	0.0128048	0.0092844	0.00735527	0.00809743	0.00911815	0.00836679	0.00577865	-0.00123253	-0.00572452	-0.0102091	-0.0162308	-0.0245387	-0.0345971
54	Streptavidin	16491	159	104	0.025	0.421	0.038	0.088	0.39	0	-0.00227609	-0.00390707	-0.00536429	-0.00941916	-0.0125878	-0.0114104	-0.00575727	-0.00327261	-0.000464679	0.000558114	0.00606821	0.0109221	0.016944	0.0180805	0.0281805	0.0402779	0.0548092	0.0694815	0.0914257	0.108263	0.135065	0.164628	0.193706	0.22535	0.263114	0.301415	0.342155	0.36886	0.37152	0.355078	0.314369	0.264077	0.199002	0.121451	0.0298634	-0.0688383	-0.174354	-0.27528	-0.364648
55	Superoxide dismutase [Cu-Zn]	15552	151	103.7	0.013	0.391	0.162	0.142	0.235	0	-0.00196149	-0.00460642	-0.00605775	-0.00349785	-0.00204674	-0.00435242	-0.00546333	-0.0082834	-0.00845563	-0.00785874	-0.00931333	-0.0111106	-0.0122244	-0.0167606	-0.0227535	-0.0272939	-0.033891	-0.0362952	-0.0392147	-0.0444481	-0.050883	-0.0570641	-0.0656479	-0.0753494	-0.0854844	-0.0954523	-0.103623	-0.114114	-0.124953	-0.136483	-0.146473	-0.157841	-0.171706	-0.1891	-0.21097	-0.23285	-0.260412	-0.29246	-0.328564
56	Thaumatin I	22204	207	107.8	0.106	0.357	0.126	0.14	0.242	0	0.00665906	0.00711033	0.0101727	0.00999452	0.00495259	0.00675522	0.00991027	0.0085603	0.0148724	0.0154164	0.0175841	0.0178583	0.0164183	0.0156996	0.0165153	0.0148935	0.0142643	0.013364	0.0108369	0.0110198	0.0126489	0.0136459	0.0118401	0.0115711	0.0169109	0.0278632	0.0445221	0.0576579	0.068898	0.0707238	0.0741814	0.0684893	0.0574478	0.0425944	0.0247426	0.00543197	-0.012073	-0.0355733	-0.0619881
57	Vitamin B12 transporter BtuB	66325.6	594	111.8	0.035	0.552	0.062	0.131	0.194	0	0.00486368	0.0059192	0.0100978	0.00900186	0.00798031	0.000543692	0.00464959	0.0110019	0.0110828	0.00672577	0.00988248	0.00335067	0.000660223	0.00688395	0.00423545	0.00177814	-0.00220315	-0.0101463	-0.0255852	-0.028471	-0.0326437	-0.0366062	-0.0434614	-0.0530036	-0.0728163	-0.0897987	-0.110711	-0.13135	-0.146456	-0.165167	-0.179539	-0.195319	-0.216465	-0.234137	-0.24933	-0.267733	-0.286493	-0.307517	-0.329241
58	Ferrienterobactin receptor	79771	724	110.3	0.033	0.477	0.106	0.075	0.276	0	0.00133488	0.002792	0.00584009	0.00878476	0.00402403	0.00226978	0.00220522	0.00353754	0.00773642	0.0130323	0.00906068	0.00669082	0.00361328	0.000932962	0.00174111	0.00233219	2.72743e-05	-0.00120142	-0.00790478	-0.0143407	-0.0203503	-0.027802	-0.0344664	-0.0415291	-0.0504487	-0.0641812	-0.0773773	-0.0895137	-0.104676	-0.118653	-0.136883	-0.159842	-0.183477	-0.206455	-0.228059	-0.247788	-0.268209	-0.287002	-0.300713
59	Ferrichrome-iron receptor	78742.1	714	110.4	0.02	0.526	0.111	0.108	0.199	0	0.00697494	0.00600797	0.00766173	0.00503417	0.00580752	0.00631207	0.00984055	0.00586105	0.00306378	0.00125285	-0.000364465	0.00342825	0.00425968	0.00334852	0.000193622	-0.00248292	-0.00473804	-0.00925968	-0.0170046	-0.0215604	-0.026344	-0.0327221	-0.0413781	-0.0509453	-0.0618793	-0.0724715	-0.0889863	-0.109601	-0.125547	-0.142631	-0.152882	-0.163132	-0.175661	-0.191606	-0.20869	-0.224636	-0.239442	-0.253109	-0.266777
60	NalP	113640	1083	105	0.075	0.63	0.052	0.045	0.198	0	0.000226018	0.00322269	0.00262593	0.0028384	0.00481911	-0.00139424	-0.00268637	-0.000990612	-0.00424241	-0.00465482	-0.00326334	-0.00764498	-0.00524633	-0.00419174	-0.00408814	-0.00608944	-0.00567152	-0.0108752	-0.0157616	-0.0192893	-0.0235493	-0.0298279	-0.0349548	-0.0414732	-0.0479725	-0.0526107	-0.0646138	-0.0742629	-0.088563	-0.0998853	-0.109486	-0.121358	-0.13429	-0.146526	-0.159384	-0.172509	-0.189253	-0.204214	-0.212465
61	Outer membrane protein G	32776.5	280	117.5	0.014	0.676	0.077	0.093	0.133	0	0.00152124	-0.00150713	-0.00336539	-0.00549668	-0.00447119	-0.00152741	-0.00172639	-0.00404321	-0.00638319	-0.0103066	-0.0105534	-0.00693766	-0.00591532	-0.00456146	-0.00625749	-0.0116983	-0.0154994	-0.0154402	-0.0149539	-0.0156565	-0.0120142	-0.0050873	0.00140699	0.00495745	0.00288289	-0.00507671	-0.0077577	-0.00932072	-0.0189466	-0.0387974	-0.0619647	-0.0927918	-0.119294	-0.147767	-0.174504	-0.204309	-0.232486	-0.258847	-0.279148
62	Outer membrane protein OPCA	27932.4	252	111.3	0.016	0.668	0.028	0.028	0.253	0	0.00208526	0.00375329	0.00569919	0.00152899	-0.00931241	-0.0108408	-0.0109792	-0.0125074	-0.0111172	-0.0122283	-0.0125057	-0.00625252	-0.00694692	-0.00958627	-0.0136147	-0.0202823	-0.0286161	-0.0390327	-0.0534765	-0.0551406	-0.0551381	-0.0544412	-0.0580494	-0.0688783	-0.0885931	-0.111917	-0.133988	-0.142729	-0.154523	-0.160624	-0.170334	-0.182542	-0.195026	-0.200432	-0.209167	-0.218316	-0.221776	-0.224125	-0.234938
63	Sucrose porin	53164.5	483	110.3	0	0.55	0.115	0.102	0.157	0	-0.00296947	-0.000713215	-0.00013952	0.000727061	0.0015934	0.00273972	0.0032235	0.00797283	0.00736085	0.00303189	0.0010079	0.00216609	0.00100806	-0.000709485	-0.00582317	-0.0108845	-0.00854279	-0.00473928	-0.00548857	-0.00790304	-0.015859	-0.0226942	-0.0315353	-0.0416574	-0.0503031	-0.0632655	-0.0810632	-0.0952875	-0.11672	-0.136801	-0.158908	-0.18856	-0.215197	-0.23887	-0.259264	-0.274921	-0.291068	-0.302784	-0.310059
64	Beta-crystallin B1	27892.2	251	111.6	0.019	0.395	0.071	0.095	0.338	0	-0.00240835	-0.00543212	-0.00813803	-0.0152962	-0.0123015	-0.00697235	-0.0133857	-0.0177086	-0.0189318	-0.0217088	-0.020346	-0.0173999	-0.0162159	-0.0109248	-0.0201959	-0.0368256	-0.0487696	-0.0519778	-0.0477725	-0.0418068	-0.058204	-0.0758962	-0.0910013	-0.0985745	-0.100929	-0.102707	-0.120587	-0.144126	-0.170128	-0.191679	-0.205917	-0.221158	-0.23886	-0.263707	-0.285773	-0.308457	-0.335054	-0.363942	-0.387329
65	Beta-crystallin S	20796.3	177	118.2	0.058	0.395	0.047	0.047	0.244	0	0.00187399	0.00315231	-0.00263156	-0.00766887	-0.00597624	-0.00401906	-0.008556	-0.0112546	-0.0115038	-0.0090549	-0.00296799	-0.00165868	-0.00189479	-0.00352374	-0.00765845	-0.0153683	-0.017653	-0.0182436	-0.014565	-0.0135026	-0.0221918	-0.0273263	-0.0312222	-0.0272394	-0.0273514	-0.0299073	-0.0490306	-0.0697015	-0.0971185	-0.115694	-0.136727	-0.158183	-0.186362	-0.218067	-0.249939	-0.282078	-0.31905	-0.351656	-0.374182
66	Beta-crystallin B2	23248.7	204	114.5	0	0.363	0.069	0.137	0.353	0	-0.00115314	-0.0016886	-0.00158901	-0.00404097	-0.00444634	-0.00313287	-0.0060686	-0.00747655	-0.0105578	-0.0130539	-0.0110786	-0.00741054	-0.00527321	-0.006021	-0.016962	-0.0280793	-0.0288719	-0.0266813	-0.0254035	-0.030755	-0.0455499	-0.0614411	-0.0712567	-0.0805235	-0.0873052	-0.0998744	-0.116053	-0.134367	-0.154076	-0.173895	-0.1889	-0.206762	-0.228448	-0.255624	-0.285957	-0.31671	-0.345832	-0.368261	-0.386188
67	Beta-2-microglobulin	11862.3	100	119.82	0	0.48	0.08	0.09	0.3	0	0.00234627	0.00426533	0.00466742	0.00317261	0.00271861	0.00148026	0.00156151	0.00304839	0.00572633	0.00651095	0.00652125	0.00480749	0.003121	0.00365966	0.00478017	0.00374398	0.00211229	0.000178838	0.000636693	0.00430762	0.0101018	0.010987	0.0113442	0.0114479	0.0135858	0.0176554	0.023967	0.0264609	0.027103	0.0249153	0.0200225	0.0141141	0.00627011	-0.00237181	-0.0148892	-0.0308704	-0.0462971	-0.0591233	-0.070297
68	Ecotin	16099.5	142	114.18	0	0.373	0.077	0.088	0.387	0	0.000441078	0.000624354	0.0174653	0.0130795	-0.0145451	-0.00943856	-0.0235567	-0.0130954	0.0123331	0.029424	0.0135976	0.00214972	-0.00998866	-0.0181349	-0.0352927	-0.050404	-0.0703623	-0.0641907	-0.0350573	-0.0150838	-0.00826323	-0.000574111	-0.00442782	-0.00665198	-0.012014	-0.020661	-0.0224415	-0.017171	-0.0347491	-0.068397	-0.0967118	-0.134289	-0.173773	-0.214092	-0.255935	-0.295201	-0.316132	-0.349317	-0.368367
69	Beta-amyloid protein 42	4645.2	43	110.6	0	0.476	0	0.048	0.476	0	-0.00121382	-0.00219955	-0.00385629	-0.00658349	-0.00898546	-0.0095048	-0.0102883	-0.00996316	-0.0105811	-0.0121892	-0.0144079	-0.0183713	-0.0208082	-0.0250644	-0.0280301	-0.0268593	-0.02695	-0.0328951	-0.0403251	-0.0527273	-0.0661623	-0.0799579	-0.0957332	-0.114745	-0.132477	-0.15405	-0.180199	-0.205275	-0.22712	-0.249096	-0.270162	-0.297389	-0.328531	-0.359233	-0.389563	-0.420967	-0.448015	-0.473477	-0.497179
70	Aldolase	39212	363	108.3	0.425	0.138	0.103	0.065	0.23	0	-0.000730201	-0.00283347	-0.00200621	-0.00376838	-0.00499321	-0.00582802	-0.00444069	-0.00370681	-0.00251792	-0.00563452	-0.00871051	-0.0114052	-0.00885351	-0.0090789	-0.0143651	-0.0200366	-0.0264756	-0.0352303	-0.0418192	-0.0502078	-0.0627893	-0.0728314	-0.0859568	-0.100169	-0.113826	-0.128842	-0.147882	-0.167598	-0.188224	-0.211892	-0.235912	-0.259326	-0.278842	-0.293218	-0.30368	-0.311831	-0.317367	-0.32248	-0.323239
71	Alkaline phosphatase	47199	450	105.1	0.278	0.183	0.133	0.12	0.228	0	-0.00222973	-0.00133237	-0.00998516	-0.0163667	-0.0214099	-0.0253574	-0.0245214	-0.0252605	-0.0320536	-0.0391424	-0.0405363	-0.0351558	-0.0300529	-0.0275129	-0.0319808	-0.0436185	-0.0542325	-0.0611104	-0.0652625	-0.0682574	-0.0753822	-0.0886972	-0.101885	-0.12193	-0.142585	-0.157586	-0.171253	-0.19964	-0.221507	-0.244481	-0.2743	-0.298146	-0.315974	-0.342062	-0.352103	-0.354818	-0.363717	-0.367617	-0.372014
72	Alpha amylase	55268	482	114.9	0.234	0.199	0.118	0.118	0.261	0	0.00436836	0.00524253	0.00229409	-0.00120094	-0.00360411	-0.00360423	-0.00568017	-0.00305816	-0.000545024	-0.00251193	-0.00688343	-0.00885112	-0.0142074	-0.0137711	-0.0173795	-0.0204418	-0.0271127	-0.0319257	-0.0435191	-0.0478966	-0.0599305	-0.0732786	-0.0895826	-0.107967	-0.130074	-0.145619	-0.163902	-0.180328	-0.194787	-0.21461	-0.22973	-0.246713	-0.258553	-0.265907	-0.269868	-0.27788	-0.278995	-0.280878	-0.284623
73	Aprotinin	6818	58	119.6	0.138	0.241	0.069	0.155	0.31	0	-0.00112744	0.000888042	2.20047e-06	-0.00128689	-0.00297943	-0.00314033	-0.00483353	-0.00225245	-0.00120335	-0.000395996	-0.00128285	-0.00249271	-0.00580119	-0.00967549	-0.0103218	-0.0126636	-0.0152484	-0.0155725	-0.0155737	-0.0192098	-0.0211503	-0.0297165	-0.0392544	-0.0478249	-0.0584182	-0.0702269	-0.0849488	-0.104445	-0.126938	-0.149759	-0.171293	-0.19186	-0.21478	-0.239566	-0.264196	-0.288508	-0.307404	-0.321851	-0.334926
74	Beta amylase	55949	498	112.6	0.311	0.114	0.127	0.09	0.267	0	0.00329218	0.00339062	0.00273413	0.00121875	0.00262408	0.00375999	0.00635383	0.00483818	0.0047899	0.00473483	0.00441259	0.00230304	-0.00146468	-0.00727109	-0.0137958	-0.0191445	-0.0245796	-0.0320038	-0.039158	-0.0471452	-0.0595057	-0.0698616	-0.0835117	-0.0987999	-0.117064	-0.138014	-0.161724	-0.187764	-0.216532	-0.245826	-0.275227	-0.302193	-0.328981	-0.35269	-0.374041	-0.388763	-0.397186	-0.405037	-0.412665
75	Carbonic anhydrase I	28739	260	111	0.085	0.288	0.096	0.165	0.265	0	0.00159092	0.00445607	0.0104583	0.0110911	0.0138374	0.016699	0.0160989	0.0176813	0.0211363	0.020848	0.0237157	0.026467	0.0246576	0.0272291	0.0258701	0.0270224	0.0290029	0.0290108	0.0290103	0.0327707	0.0353547	0.040514	0.0420831	0.0407209	0.0388863	0.0371969	0.0363602	0.0365568	0.0388123	0.0441994	0.0499269	0.0550631	0.0564175	0.0548819	0.0462924	0.0277155	0.00519468	-0.0226338	-0.0521654
76	Carbonic anhydrase II	28979	259	112.3	0.079	0.29	0.116	0.156	0.268	0	0.00961466	0.0139941	0.0225716	0.026538	0.0313753	0.0290467	0.0284651	0.0266975	0.0376971	0.047855	0.0597188	0.0600323	0.0553481	0.0499701	0.0497843	0.0501468	0.0535644	0.0536337	0.0492527	0.04607	0.0372348	0.0298011	0.0213261	0.0143072	0.00236724	-0.0159043	-0.0403889	-0.072763	-0.115171	-0.153211	-0.186727	-0.218042	-0.254439	-0.303913	-0.368726	-0.430772	-0.486237	-0.531788	-0.579215
77	Carboxypeptidase A1	34760	309	112.9	0.362	0.163	0.114	0.134	0.202	0	0.0013567	0.00127906	0.00562055	0.00565454	0.00627847	0.00724675	0.00573176	0.000944266	0.00210206	0.000842197	-0.000228156	-5.10725e-05	-0.00212007	-0.00496056	-0.0103344	-0.0199842	-0.0247362	-0.0333265	-0.0443248	-0.0567624	-0.0745234	-0.0985716	-0.118651	-0.139468	-0.162873	-0.18505	-0.206883	-0.226398	-0.242487	-0.249114	-0.256394	-0.262418	-0.271678	-0.282064	-0.288831	-0.290299	-0.289965	-0.294881	-0.302596
78	3-dehydroquinate dehydratase	27649	252	110.2	0.409	0.187	0.091	0.091	0.159	0	0.0002858	-0.000697639	-0.00202264	-0.00232707	-0.0019255	-0.00186444	-0.00154294	-0.00169447	-0.00239669	-0.00358572	-0.00435326	-0.00582828	-0.00763173	-0.0101949	-0.0134586	-0.0184173	-0.0229923	-0.0289279	-0.0371193	-0.0473663	-0.0592941	-0.0733594	-0.0883403	-0.107028	-0.127447	-0.14994	-0.174073	-0.199124	-0.225351	-0.251407	-0.275485	-0.297569	-0.31656	-0.332889	-0.347038	-0.357755	-0.364399	-0.368411	-0.368427
79	Deoxyribonuclease-1	29066	260	112.2	0.254	0.262	0.081	0.1	0.246	0	-0.000133328	0.00079764	0.00292636	0.00206144	0.00219448	0.00159547	0.00159536	0.00132897	0.000330155	-0.00293288	-0.00652967	-0.00979433	-0.0123271	-0.0151936	-0.0181274	-0.0233276	-0.0307951	-0.0377978	-0.047802	-0.0578084	-0.0696183	-0.0821641	-0.0953135	-0.109467	-0.125224	-0.14252	-0.164091	-0.182798	-0.200775	-0.216687	-0.235608	-0.255333	-0.280341	-0.305287	-0.333111	-0.362813	-0.394726	-0.420967	-0.447219
80	Ferredoxin	5499	55	101.8	0.073	0.182	0.218	0.055	0.418	0	-0.00400573	-0.013779	-0.0164025	-0.0195542	-0.0197358	-0.0160655	-0.00748385	-0.00941075	-0.00414613	-0.00765374	-0.0116934	-0.0210141	-0.0231333	-0.0266642	-0.027733	-0.0291561	-0.033581	-0.0385416	-0.0415656	-0.0421181	-0.0446179	-0.0485377	-0.0521087	-0.0574578	-0.0665409	-0.0699542	-0.0845672	-0.093866	-0.0955258	-0.0986125	-0.101525	-0.104085	-0.110396	-0.111537	-0.119648	-0.120618	-0.128747	-0.139215	-0.145934
81	Glucose oxidase	63274	583	108.7	0.269	0.192	0.123	0.091	0.211	0	0.00247764	0.00154273	0.00262891	0.00455918	0.00523291	0.00644898	0.00802795	0.00455983	0.00670851	0.00950212	0.00777682	0.00406803	-0.000729459	-0.00684888	-0.0139362	-0.0144863	-0.0192417	-0.0230891	-0.0271503	-0.0312828	-0.0353318	-0.0352985	-0.0400834	-0.0457448	-0.0560564	-0.0667637	-0.0808056	-0.0959855	-0.110659	-0.12791	-0.15114	-0.179282	-0.212525	-0.252613	-0.286045	-0.314563	-0.341835	-0.365242	-0.382967
82	Glutamate dehydrogenase I	55562	501	111.1	0.455	0.126	0.124	0.074	0.169	0	0.000129122	-0.000441355	-0.00126034	-0.0011581	-0.00117404	-0.00108307	-0.000187545	0.000415279	0.000340525	9.02551e-06	-8.97899e-05	-0.00171334	-0.00477961	-0.0078247	-0.011384	-0.0156294	-0.0197965	-0.0255504	-0.033562	-0.0415481	-0.0502121	-0.060288	-0.0721334	-0.0867585	-0.103493	-0.122943	-0.143705	-0.165736	-0.188815	-0.21244	-0.234552	-0.25622	-0.275205	-0.291012	-0.303871	-0.31304	-0.317776	-0.320253	-0.318826
83	Glycogen phosphorylase-b	97159	842	115.8	0.441	0.15	0.099	0.069	0.185	0	-0.00112572	-0.00147067	-0.00211979	-0.00349746	-0.00295676	-0.00192379	-0.00205284	0.000326228	0.000466532	-0.00207665	-0.00487556	-0.00209743	-0.0033574	-0.00522853	-0.0107777	-0.0168299	-0.0244354	-0.0308416	-0.0433461	-0.054006	-0.0679897	-0.0801472	-0.0915231	-0.106572	-0.126444	-0.145875	-0.168276	-0.187428	-0.207289	-0.229335	-0.254833	-0.279374	-0.305165	-0.329044	-0.351566	-0.367999	-0.383175	-0.3901	-0.393593
84	Haloalkane dehalogenase	33332	294	113.8	0.367	0.184	0.095	0.088	0.173	0	-0.00269636	0.00292187	-0.000862538	0.00614421	0.00851071	0.00976758	0.0104092	0.00901931	0.00183728	0.00114204	-0.00150319	-0.00615857	-0.0102944	-0.0103232	-0.0168508	-0.0221638	-0.0192704	-0.0294192	-0.0355632	-0.0402342	-0.0612285	-0.0845356	-0.102211	-0.120865	-0.133701	-0.15155	-0.177258	-0.210111	-0.238649	-0.266529	-0.286776	-0.304571	-0.322973	-0.336596	-0.344271	-0.351583	-0.348415	-0.34014	-0.333515
85	Lactoferrin	76144	689	110.7	0.296	0.176	0.183	0.139	0.181	0	-0.000905145	0.00108664	-0.000323334	-0.00271707	-0.00391448	-0.00142261	-0.00143283	-0.000272682	-0.00236902	-0.00436631	-0.00571963	-0.0044427	-0.00505684	-0.00723045	-0.0124196	-0.0162801	-0.0215499	-0.02687	-0.0361241	-0.0479474	-0.0647673	-0.0751894	-0.0870142	-0.0985047	-0.11134	-0.123126	-0.137631	-0.146039	-0.159814	-0.178289	-0.199665	-0.219763	-0.243275	-0.266778	-0.28934	-0.314937	-0.339105	-0.35928	-0.382472
86	Monellin	11086	94	119.2	0.17	0.521	0.101	0.037	0.17	0	0.00205256	0.0016907	-0.00174245	-0.000375929	0.0033163	0.00340505	0.00230506	-0.00112149	-0.00567465	-0.00435301	-0.00191306	-0.000872727	-9.6474e-05	0.000602548	-0.000165188	-0.00165036	-0.00301636	-0.00375638	-0.00215831	0.000584068	0.00539501	0.00731593	0.00634225	0.00477824	0.000215286	-0.0107888	-0.0242261	-0.0435127	-0.068746	-0.0951939	-0.122561	-0.152517	-0.180942	-0.20866	-0.241528	-0.273979	-0.306257	-0.336488	-0.363064
87	Nitrogen metabolite repression regulator	38796	352	110.5	0.338	0.159	0.111	0.101	0.268	0	0.00172552	0.00102406	0.00149851	0.00271398	0.00290077	0.0036758	0.00326645	-0.00107759	-0.00444343	-0.00708775	-0.0082733	-0.00926402	-0.0109321	-0.0140616	-0.0177566	-0.0234382	-0.0283599	-0.0350454	-0.0441926	-0.0563866	-0.0708994	-0.0887085	-0.110014	-0.131127	-0.156453	-0.182828	-0.211806	-0.242239	-0.277196	-0.311043	-0.346355	-0.377127	-0.404284	-0.424183	-0.439004	-0.44849	-0.4506	-0.444107	-0.43233
88	Ovalbumin	42750	385	111.3	0.274	0.289	0.094	0.045	0.272	0	-0.0029266	-0.00442189	-0.0054568	-0.00104047	-0.00140131	-0.00190293	-6.71241e-05	-0.000652856	-0.00359427	-0.00300114	-0.00543379	-0.00703139	-0.00631239	-0.00657262	-0.0107844	-0.0132999	-0.0149	-0.0201354	-0.0259431	-0.0361811	-0.0473168	-0.0593591	-0.0721248	-0.0864671	-0.0994985	-0.118513	-0.136449	-0.161148	-0.189337	-0.217608	-0.242509	-0.265187	-0.284317	-0.308539	-0.32919	-0.348102	-0.363816	-0.373899	-0.380076
89	Ovotransferrin	75633	686	110.4	0.261	0.166	0.157	0.176	0.201	0	0.00116053	-0.000129067	-0.00379627	-0.00622393	-0.00334764	0.00600506	0.00893038	0.00937055	0.00899831	0.00270193	-0.0030614	-0.00186686	-0.00559938	-0.0121113	-0.0170082	-0.0194689	-0.0254878	-0.0295526	-0.0348307	-0.04614	-0.0531779	-0.0613748	-0.083134	-0.0978058	-0.109492	-0.123161	-0.135558	-0.155985	-0.18995	-0.215269	-0.240509	-0.264739	-0.287695	-0.30376	-0.329298	-0.351026	-0.370928	-0.383234	-0.394332
90	Papain	23429	212	111	0.231	0.179	0.132	0.104	0.283	0	-0.00211144	-0.00897584	-0.00739244	-0.00990207	-0.0110917	-0.0128102	-0.0151896	-0.0149272	-0.0132111	-0.0141379	-0.0178408	-0.0247178	-0.0278946	-0.0305432	-0.033457	-0.0355783	-0.0377001	-0.044983	-0.0535917	-0.064056	-0.0749205	-0.0861856	-0.0994402	-0.113229	-0.128743	-0.151151	-0.180721	-0.214805	-0.258575	-0.297717	-0.331304	-0.363044	-0.387764	-0.410768	-0.42741	-0.441802	-0.452484	-0.460116	-0.465891
91	Phosphoglucomutase 1	61427	561	109.7	0.33	0.25	0.127	0.088	0.171	0	0.000998858	0.000176859	-0.00138721	-0.00238353	-0.00485291	-0.00465874	-0.00338374	-0.00313575	-0.00405275	-0.00378165	-0.00585147	-0.0052224	-0.00548981	-0.00731413	-0.0121563	-0.0165718	-0.0234733	-0.0300161	-0.0368672	-0.0445008	-0.0559404	-0.0671951	-0.0818569	-0.0996927	-0.117049	-0.137738	-0.161216	-0.18709	-0.213314	-0.238536	-0.25981	-0.280032	-0.299119	-0.315795	-0.329825	-0.340353	-0.349207	-0.357005	-0.360656
92	Phosphoglycerate kinase	44608	415	107.7	0.345	0.111	0.041	0.229	0.27	0	0.000879459	0.00179135	0.00229103	0.000155433	-0.000452987	-0.00140924	-0.0011933	-0.00176725	-0.0020238	-0.00517786	-0.00531115	-0.00768302	-0.00724263	-0.0101962	-0.0141721	-0.0215341	-0.0250276	-0.0310692	-0.0352081	-0.0421429	-0.0541918	-0.0682452	-0.0810898	-0.0956572	-0.112666	-0.13068	-0.153892	-0.17737	-0.20443	-0.23392	-0.261537	-0.286078	-0.30888	-0.324479	-0.342545	-0.359584	-0.371319	-0.380425	-0.3857
93	Phenylethanolamine N-methyltransferase	31807	289	110.4	0.309	0.229	0.113	0.078	0.222	0	-0.00889496	-0.0115432	-0.0129683	-0.00993514	-0.000815896	0.00184303	-0.00106634	0.00185592	-0.00196657	-0.00891256	-0.0124244	-0.0127544	-0.0123687	-0.0110703	-0.0143992	-0.0206043	-0.0282557	-0.0361803	-0.0450983	-0.0538336	-0.0680193	-0.0840624	-0.10177	-0.119899	-0.143707	-0.164658	-0.188668	-0.214362	-0.238777	-0.255444	-0.269498	-0.278485	-0.29033	-0.299148	-0.305464	-0.306885	-0.309436	-0.315971	-0.321787
94	Pyruvate kinase	57918	530	109.5	0.354	0.189	0.117	0.106	0.191	0	0.00178477	-0.00094368	-0.00637137	-0.0119911	-0.0115677	-0.0101984	-0.00474924	-0.000913976	-0.00363878	-0.00843076	-0.00933986	-0.0090789	-0.00327583	-0.000669173	-0.00359934	-0.0062247	-0.0169985	-0.0232152	-0.0341046	-0.0419249	-0.0511702	-0.0662112	-0.0859163	-0.0989537	-0.119054	-0.134061	-0.154431	-0.185862	-0.217189	-0.244994	-0.267115	-0.288281	-0.310397	-0.32607	-0.343062	-0.354092	-0.362209	-0.370877	-0.378595
95	Rhodanese	33164	296	112.4	0.291	0.125	0.125	0.122	0.28	0	0.000431097	0.000553003	-0.0019685	-0.000165567	-0.00546819	0.00217132	0.00342438	0.00287175	0.000710654	-0.00307205	-0.0116305	-0.0139783	-0.0108516	-0.00905585	-0.00869275	-0.012556	-0.0148758	-0.0208156	-0.0254908	-0.0361757	-0.0479842	-0.0609404	-0.0703376	-0.0851895	-0.0993393	-0.115556	-0.13085	-0.146445	-0.1588	-0.177331	-0.194825	-0.213107	-0.233085	-0.250949	-0.265197	-0.27599	-0.284604	-0.2899	-0.298065
96	Ribonuclease, pancreatic	13690	124	111.3	0.177	0.331	0.145	0.105	0.185	0	-0.000279784	-0.0039857	-0.00360157	-0.0015035	-0.00237227	-0.00426503	-0.00526277	-0.00321441	-0.000755454	0.000321506	-0.00172645	-0.000572325	-0.00239074	0.00191684	0.000764864	0.00258732	0.00330754	0.00361759	0.000565859	0.00226153	-0.000278295	-0.00210021	-0.00600348	-0.0149696	-0.0345268	-0.0508795	-0.0718415	-0.0983923	-0.126343	-0.157394	-0.1952	-0.233587	-0.270371	-0.308225	-0.345786	-0.38558	-0.421914	-0.458082	-0.487515
97	Subtilisin Carlsberg	27302	274	100	0.292	0.172	0.164	0.102	0.245	0	0.000914016	0.0015016	0.000848729	0.0015016	0.000587582	-0.00352549	-0.000914016	-0.00189332	-0.00306849	-0.00483123	-0.00718157	-0.0111641	-0.0109029	-0.0133838	-0.0180845	-0.0249396	-0.0340798	-0.0434158	-0.0487693	-0.0533394	-0.060782	-0.0697917	-0.0827187	-0.0976693	-0.11706	-0.136711	-0.16041	-0.183391	-0.207286	-0.230594	-0.25932	-0.286283	-0.313443	-0.337207	-0.360449	-0.378664	-0.393354	-0.402494	-0.40628
98	Triose phosphate isomerase	26664	247	108.4	0.389	0.162	0.107	0.063	0.215	0	-0.003269	-0.00685522	-0.00559002	-0.00400802	-0.00295319	-0.00390305	-0.00327008	-0.00432577	-0.00284818	-0.00390409	-0.00527701	-0.00823433	-0.0107699	-0.0117217	-0.014047	-0.0180635	-0.0232433	-0.0280016	-0.0342409	-0.0420673	-0.0543359	-0.0677706	-0.0831125	-0.0958136	-0.114336	-0.137094	-0.159857	-0.18506	-0.210375	-0.234216	-0.258908	-0.284559	-0.305558	-0.325185	-0.344076	-0.360642	-0.371915	-0.38139	-0.38843
99	Ubiquitin	8565	76	114.2	0.158	0.316	0.145	0.039	0.224	0	0.00151847	-0.00189514	-0.00290657	-0.00720843	-0.0053105	-0.005817	-0.00239848	-0.000498247	0.00279627	0.00457181	0.0088827	-0.000494515	-0.00455078	-0.00581889	-0.00822915	-0.00632685	-0.00772308	-0.0188933	-0.025752	-0.03655	-0.0468448	-0.0543493	-0.0690999	-0.0832213	-0.0998919	-0.114153	-0.129311	-0.149055	-0.169825	-0.189588	-0.210376	-0.216915	-0.226384	-0.234202	-0.236928	-0.237105	-0.233333	-0.222038	-0.216983
100	Acriflavine resistance protein B	113574	1049	108.4	0.486	0.186	0.086	0.065	0.151	0	-0.00176313	-0.00291658	-0.00335229	-0.00315061	-0.00190251	-0.00151238	-0.000851658	-0.00230464	-0.00260283	-0.00270243	-0.00183606	-0.00352524	-0.00386997	-0.0075895	-0.0104724	-0.0140023	-0.0179805	-0.0239742	-0.0279951	-0.0351164	-0.043257	-0.0523278	-0.0634514	-0.0761044	-0.0892099	-0.10498	-0.12378	-0.141979	-0.16138	-0.181208	-0.201025	-0.221227	-0.243161	-0.261274	-0.277169	-0.28859	-0.295801	-0.300441	-0.304638
101	Inwardly rectifying k+ channel	35500.9	320	111.3	0.259	0.289	0.106	0.075	0.249	0	0.00227881	0.00248362	0.00438332	0.00619866	0.000303975	-0.00606852	-0.0100279	-0.0129923	-0.0123164	-0.00883923	-0.00409795	-0.00408497	-0.0096415	-0.0170565	-0.0238153	-0.0278256	-0.0287677	-0.0327575	-0.0429023	-0.0516889	-0.0611343	-0.0730316	-0.0846151	-0.0928708	-0.104812	-0.121729	-0.145885	-0.172886	-0.1958	-0.212202	-0.225179	-0.238635	-0.255332	-0.274847	-0.290387	-0.2981	-0.307204	-0.315416	-0.320293
102	TraF protein	78714.4	728	108.3	0.114	0.288	0.092	0.085	0.391	0	-0.00140075	0.00470012	0.00332269	0.00174649	0.00157554	0.00358097	0.00394186	0.00370951	0.00483194	0.00401328	0.00252035	-0.0012405	-0.0103732	-0.012154	-0.00540293	-0.00439441	-0.00166529	-0.00295254	-0.0117285	-0.014522	-0.0099643	-0.0113501	-0.0144655	-0.0188216	-0.028769	-0.0394218	-0.0445608	-0.0534256	-0.0628582	-0.0786838	-0.0982866	-0.121393	-0.146891	-0.171717	-0.188149	-0.21308	-0.231259	-0.24911	-0.272783
103	Sarcoplasmic/endoplasmic reticulum calcium ATPase 1	110459	1001	110.5	0.427	0.161	0.111	0.098	0.165	0	-0.000680168	-0.000452016	0.00149953	0.00201634	0.00175594	-0.000437199	-8.77075e-05	-0.00154719	-0.00135148	-0.000372491	-0.00191439	-0.00372376	-0.00404906	-0.00448463	-0.00442265	-0.00969155	-0.0165464	-0.0229415	-0.0304693	-0.0377043	-0.0468344	-0.0608932	-0.0771261	-0.0928596	-0.108051	-0.124977	-0.141912	-0.158596	-0.181645	-0.206172	-0.225629	-0.247752	-0.264873	-0.281496	-0.295049	-0.30538	-0.310673	-0.317154	-0.317288
104	Outer membrane lipoprotein Wza	41685.6	379	110.3	0.224	0.24	0.139	0.07	0.247	0	-0.00188304	-0.00208541	-0.00110357	-0.00274663	-0.00303569	-0.000629971	0.00242413	0.000566573	-0.000598958	-0.00601073	-0.0103226	-0.0141054	-0.0100759	-0.00768921	-0.004007	-0.00392465	-0.00990021	-0.0163223	-0.0227988	-0.0310723	-0.0358778	-0.0454189	-0.0624829	-0.076	-0.0950405	-0.11139	-0.121521	-0.134411	-0.145165	-0.156615	-0.175568	-0.190882	-0.211949	-0.233544	-0.252535	-0.273032	-0.29355	-0.308143	-0.32292
105	Sodium/potassium-transporting ATPase	154416	1384	111.7	0.337	0.114	0.113	0.141	0.232	0	0.00555743	0.00941838	0.00947057	0.0070708	0.00585883	-0.0019304	-0.00628773	-0.00267437	-0.0048574	-0.00215113	-0.00317647	-0.0109374	-0.0147187	-0.0120701	-0.0177676	-0.0185255	-0.0248664	-0.0340159	-0.0421879	-0.0436527	-0.0535659	-0.0615042	-0.0683146	-0.0819462	-0.101569	-0.122666	-0.147418	-0.169372	-0.196946	-0.226077	-0.256777	-0.278677	-0.292962	-0.303609	-0.318467	-0.332486	-0.345532	-0.3495	-0.351054
106	Antithrombin-III	48439.5	427	113.708	0.238	0.267	0.126	0.077	0.261	0	0.0123767	-0.0269377	0.0115931	-0.0104053	-0.00466861	0.0112264	-0.0203727	-0.00800735	0.0260692	0.00484264	-0.0565495	-0.017367	-0.0201401	-0.00474645	-0.0194563	-0.0242925	-0.000849983	-0.0322408	-0.0577974	-0.111069	-0.0817032	-0.10143	-0.111046	-0.107202	-0.154114	-0.116709	-0.172985	-0.210724	-0.230115	-0.275112	-0.268075	-0.300363	-0.314026	-0.337771	-0.329889	-0.347091	-0.371692	-0.367729	-0.374353
107	Alpha-1-antitrypsin	44326.6	394	112.8	0.251	0.279	0.102	0.079	0.259	0	0.0005775	-0.00147258	-0.00231441	-0.00242874	4.88153e-05	0.00410539	0.00599753	0.00582236	0.00229563	0.000758722	-0.00273967	-0.00461398	-0.00571732	-0.00761746	-0.0127044	-0.0184542	-0.0244532	-0.0340208	-0.0466064	-0.0519709	-0.05975	-0.0699441	-0.0781287	-0.100676	-0.123211	-0.134591	-0.148884	-0.166198	-0.188566	-0.218835	-0.24226	-0.262163	-0.277095	-0.28742	-0.295969	-0.303461	-0.308633	-0.323091	-0.330378
108	Alpha-2-macroglobulin	160810	1451	110.9	0.123	0.284	0.075	0.115	0.368	0	0.00781866	0.00738201	0.00950334	0.0211845	0.0127219	0.00208937	0.0012739	0.00163546	-0.00804276	-0.00893633	-0.0105672	-0.0141336	-0.00523049	-0.00390103	0.000764975	-0.00162017	0.00446493	-0.00393224	-0.0155168	-0.0429613	-0.042719	-0.0507701	-0.0467817	-0.0499762	-0.0558567	-0.0726816	-0.0769956	-0.0989923	-0.114072	-0.136481	-0.153872	-0.178028	-0.193465	-0.210739	-0.217806	-0.225065	-0.235828	-0.250842	-0.268004
109	Human dUTPase	16218.2	147	111.08	0.48	0.385	0.086	0.088	0.379	0	-0.00231355	-0.00489383	-0.0146039	-0.0107111	-0.00308442	-0.00397001	-0.00842087	-0.00872886	-0.00890868	-0.009004	-0.00614293	-0.00817876	-0.00950879	-0.0129141	-0.0112891	-0.0164221	-0.0164654	-0.0154913	-0.0138461	-0.0143461	-0.011842	-0.0170703	-0.0131049	-0.0206143	-0.022043	-0.0143794	-0.0246751	-0.0355837	-0.0502914	-0.0752923	-0.0925764	-0.102624	-0.132212	-0.148369	-0.16807	-0.18705	-0.213535	-0.230213	-0.25815
110	3-isopropylmalate dehydrogenase	38347.9	359	107.12	0.412	0.17	0	0.081	0.184	0	0.00478261	0.00426969	0.00296804	0.00491815	0.00698052	0.00806453	0.00911934	0.0054412	0.0021819	0.0016662	-0.000911844	-0.00228381	-0.00534274	-0.00921059	-0.0115486	-0.0148106	-0.0203878	-0.0276545	-0.0333668	-0.041147	-0.0496614	-0.0625441	-0.0799025	-0.0957751	-0.112147	-0.132854	-0.152277	-0.176665	-0.200748	-0.220266	-0.238991	-0.255685	-0.268833	-0.284594	-0.29179	-0.300489	-0.306151	-0.309862	-0.310926
111	BI-32169	2037.3	19	113.2	0.158	0.211	0.105	0.263	0.211	0	-0.00228868	-0.00144489	-0.00511772	-0.00198136	0.000839412	-0.0032039	-0.00645021	-0.00421033	-0.005422	-0.00532975	-0.00560823	-0.00835987	-0.00937755	-0.00392243	-0.00836887	-0.00770762	-0.0081256	-0.0157384	-0.0275258	-0.0307107	-0.0417782	-0.0415102	-0.0386191	-0.0361382	-0.0294035	-0.0261229	-0.0184125	-0.00321968	0.013615	0.0455276	0.0720097	0.0853931	0.0963648	0.0945822	0.0890658	0.0875843	0.0850834	0.0799908	0.0816048
112	Bj-xtrIT	9423.6	84	113	0.262	0.179	0.107	0.06	0.357	0	-0.000606734	-0.0135598	-0.0231562	-0.0187323	-0.0177691	-0.0144689	-0.00457744	-0.00201347	-0.0108512	-0.00517199	-0.00191646	-8.84752e-05	-0.00146403	-0.00972236	-0.0149017	-0.012849	-0.0193493	-0.0318547	-0.0405772	-0.063347	-0.0795653	-0.085163	-0.0954756	-0.100017	-0.0984423	-0.105194	-0.13019	-0.148711	-0.183359	-0.206808	-0.224952	-0.239501	-0.259205	-0.274109	-0.297131	-0.316591	-0.343677	-0.373906	-0.395766
[truncated: 31 more columns]
