# Supplementary material for: Machine-learning-guided identification of protein secondary structures using spectral and structural descriptors
Source: Royal Society of Chemistry journal article supplement (doi:10.1039/d5bm00153f), 2025-01-01
Supplement: d5bm00153f3.xlsx [file d5bm00153f3.xlsx]

## Sheet: Sheet1
No	1	2	3	4	5	6	7	8	9	10	11	12	13	14	15	16
Protein Name	Peroxidase C1	Phospholipase A2	Ammonia channel	Na(+):neurotransmitter symporter	Light harvesting protein	Large-conductance mechanosensitive channel	Sensory rhodopsin-2	Concanavalin A	Gamma-B crystallin	Gamma-D crystallin	Lectin (pea)	Pectate lyase C	Sucrose porin	Beta-crystallin B1	Beta-crystallin S	Beta-crystallin B2
Type	Alpha Helix	Alpha Helix	Alpha Helix	Alpha Helix	Alpha Helix	Alpha Helix	Alpha Helix	Beta Sheet	Beta Sheet	Beta Sheet	Beta Sheet	Beta Sheet	Beta Sheet	Beta Sheet	Beta Sheet	Beta Sheet
190	0.588594	0.555928	0.663257	0.536668	0.676447	0.625888	0.642554	0.236049	0.609764	0.616499	0.398834	0.466875	0.621991	0.338155	0.583516	0.554382
191	0.616209	0.584661	0.683136	0.583095	0.694957	0.648722	0.676919	0.32509	0.68308	0.626221	0.503082	0.510385	0.664152	0.374879	0.551952	0.575586
192	0.633377	0.597706	0.694716	0.628117	0.690516	0.66537	0.694101	0.417915	0.72812	0.617958	0.589297	0.529243	0.687305	0.374979	0.524738	0.574511
193	0.623406	0.586912	0.690532	0.6696	0.670739	0.672597	0.694101	0.516249	0.746618	0.588017	0.658851	0.52555	0.687701	0.313512	0.481105	0.560647
194	0.581091	0.560106	0.670611	0.706134	0.639341	0.665986	0.676919	0.592226	0.751313	0.550854	0.70974	0.507609	0.675212	0.263281	0.408149	0.538916
195	0.508924	0.515171	0.634422	0.7175	0.588542	0.645953	0.636827	0.64585	0.73733	0.519851	0.749296	0.45514	0.636551	0.182826	0.342376	0.497617
196	0.406575	0.452942	0.573308	0.704084	0.523243	0.611609	0.591008	0.672764	0.696654	0.492744	0.765058	0.393588	0.580957	0.0805475	0.286006	0.431348
197	0.282882	0.377255	0.499315	0.655619	0.440037	0.556218	0.517698	0.664054	0.632129	0.461878	0.743002	0.31742	0.508628	-0.0529687	0.222237	0.341066
198	0.163056	0.282904	0.4063	0.573536	0.341585	0.476006	0.42606	0.620171	0.549376	0.411629	0.703615	0.234186	0.423159	-0.204472	0.15434	0.228198
199	0.0465738	0.18411	0.303534	0.467185	0.242749	0.37645	0.317239	0.554011	0.439857	0.335376	0.663731	0.14543	0.342909	-0.352215	0.0728139	0.124637
200	-0.0563479	0.0860742	0.206305	0.356806	0.148331	0.267916	0.207847	0.467927	0.323061	0.242417	0.626562	0.061898	0.278814	-0.449542	-0.0165213	0.0337192
201	-0.137286	-0.00585456	0.112836	0.243834	0.0623958	0.162272	0.109336	0.383423	0.212031	0.132628	0.592563	-0.017591	0.217052	-0.526779	-0.0949596	-0.0577088
202	-0.203586	-0.0928162	0.0270459	0.141628	-0.0127004	0.0657995	0.0258877	0.306095	0.109421	0.0289325	0.546612	-0.087767	0.160737	-0.572001	-0.14171	-0.141062
203	-0.257551	-0.167586	-0.0443422	0.0515906	-0.0785305	-0.0208472	-0.0508018	0.244367	0.0226252	-0.0564064	0.486916	-0.146741	0.108834	-0.608262	-0.160511	-0.213702
204	-0.293708	-0.238283	-0.111599	-0.032351	-0.138547	-0.098732	-0.118614	0.187465	-0.0391059	-0.108512	0.417024	-0.19545	0.0512231	-0.623603	-0.165228	-0.268439
205	-0.323108	-0.294343	-0.170689	-0.106396	-0.190739	-0.167572	-0.181042	0.141354	-0.0746799	-0.142833	0.341332	-0.23673	0.00737568	-0.625021	-0.170117	-0.297907
206	-0.344542	-0.334283	-0.217932	-0.165377	-0.236421	-0.226378	-0.231443	0.0923102	-0.0987346	-0.16339	0.265799	-0.270016	-0.0326366	-0.62238	-0.184233	-0.317403
207	-0.359765	-0.364428	-0.26169	-0.211517	-0.268822	-0.273042	-0.269244	0.0451323	-0.115653	-0.183753	0.193314	-0.296993	-0.0739255	-0.614223	-0.203917	-0.330918
208	-0.366266	-0.386988	-0.285801	-0.242294	-0.290432	-0.304535	-0.293299	0.00197061	-0.123554	-0.198909	0.125681	-0.323052	-0.115213	-0.607313	-0.225825	-0.33548
209	-0.366623	-0.393366	-0.295334	-0.257796	-0.303044	-0.319178	-0.305326	-0.0402507	-0.134569	-0.222768	0.0652227	-0.347728	-0.152688	-0.600353	-0.250063	-0.341311
210	-0.360677	-0.392283	-0.294508	-0.264053	-0.305043	-0.319702	-0.305899	-0.0796886	-0.150497	-0.245527	0.0152675	-0.372173	-0.18364	-0.580317	-0.275269	-0.350072
211	-0.355682	-0.390793	-0.287429	-0.260244	-0.301803	-0.313186	-0.299599	-0.114072	-0.168981	-0.275446	-0.0302534	-0.395462	-0.205053	-0.573191	-0.302681	-0.35863
212	-0.351836	-0.384239	-0.277827	-0.254495	-0.294981	-0.307127	-0.288144	-0.145861	-0.189715	-0.306302	-0.0703654	-0.414089	-0.229309	-0.570297	-0.333852	-0.37753
213	-0.345883	-0.379015	-0.272392	-0.248935	-0.288989	-0.30383	-0.283562	-0.173276	-0.20832	-0.329001	-0.105967	-0.430128	-0.242463	-0.565713	-0.360426	-0.396237
214	-0.33824	-0.373577	-0.269781	-0.248533	-0.286141	-0.301824	-0.284135	-0.199882	-0.219472	-0.343925	-0.136897	-0.444155	-0.257862	-0.554463	-0.378792	-0.406279
215	-0.332314	-0.367095	-0.275705	-0.250421	-0.287705	-0.299555	-0.286426	-0.228378	-0.234087	-0.363569	-0.163818	-0.456571	-0.271859	-0.539084	-0.395767	-0.416772
216	-0.32936	-0.369256	-0.282976	-0.253508	-0.289092	-0.297971	-0.286999	-0.251585	-0.239614	-0.372748	-0.183268	-0.465827	-0.277929	-0.524431	-0.411542	-0.424414
217	-0.330152	-0.375288	-0.292896	-0.257493	-0.290393	-0.300412	-0.289863	-0.269137	-0.248687	-0.373779	-0.197582	-0.470757	-0.289018	-0.506325	-0.416484	-0.423961
218	-0.331793	-0.386763	-0.29969	-0.263101	-0.288332	-0.30707	-0.286426	-0.280732	-0.247751	-0.366057	-0.204255	-0.469847	-0.302999	-0.479777	-0.413658	-0.420196
219	-0.33128	-0.395004	-0.30239	-0.268524	-0.288017	-0.314788	-0.287572	-0.288582	-0.239146	-0.355871	-0.208917	-0.465441	-0.30678	-0.456173	-0.405756	-0.41405
220	-0.330211	-0.400203	-0.304048	-0.273786	-0.287484	-0.320802	-0.289863	-0.299248	-0.229413	-0.339759	-0.209672	-0.458788	-0.312299	-0.421628	-0.394388	-0.401879
221	-0.327364	-0.400321	-0.305284	-0.276874	-0.287388	-0.325291	-0.288144	-0.311075	-0.221084	-0.319539	-0.209798	-0.449967	-0.310059	-0.387329	-0.374182	-0.386188
222	-0.324033	-0.401836	-0.298208	-0.27916	-0.286069	-0.327403	-0.283562	-0.320873	-0.207488	-0.299254	-0.212241	-0.439375	-0.302784	-0.363942	-0.351656	-0.368261
223	-0.318131	-0.400905	-0.292693	-0.2825	-0.282131	-0.325538	-0.278981	-0.327236	-0.193251	-0.273023	-0.2196	-0.428062	-0.291068	-0.335054	-0.31905	-0.345832
224	-0.310397	-0.402294	-0.287317	-0.281102	-0.272519	-0.320416	-0.269817	-0.326735	-0.172216	-0.242005	-0.226386	-0.415291	-0.274921	-0.308457	-0.282078	-0.31671
225	-0.300803	-0.401403	-0.279562	-0.277407	-0.258019	-0.311246	-0.260653	-0.318764	-0.147226	-0.21705	-0.232085	-0.402766	-0.259264	-0.285773	-0.249939	-0.285957
226	-0.291795	-0.392804	-0.270272	-0.270587	-0.242516	-0.299756	-0.245762	-0.304244	-0.123685	-0.190613	-0.234942	-0.389217	-0.23887	-0.263707	-0.218067	-0.255624
227	-0.279568	-0.379922	-0.256091	-0.259529	-0.227582	-0.287127	-0.22858	-0.283487	-0.0986264	-0.16147	-0.23361	-0.373303	-0.215197	-0.23886	-0.186362	-0.228448
228	-0.262382	-0.36025	-0.235739	-0.249698	-0.212648	-0.271842	-0.208534	-0.257231	-0.0751186	-0.13638	-0.229334	-0.354962	-0.18856	-0.221158	-0.158183	-0.206762
229	-0.241336	-0.336824	-0.218079	-0.236923	-0.197061	-0.253837	-0.187915	-0.231414	-0.0534354	-0.109594	-0.228801	-0.333099	-0.158908	-0.205917	-0.136727	-0.1889
230	-0.217012	-0.311633	-0.204449	-0.219818	-0.180821	-0.232759	-0.168442	-0.203101	-0.0327168	-0.0862799	-0.227138	-0.308139	-0.136801	-0.191679	-0.115694	-0.173895
231	-0.193895	-0.282219	-0.189503	-0.199684	-0.163316	-0.208671	-0.15126	-0.171312	-0.0180169	-0.064139	-0.215882	-0.279745	-0.11672	-0.170128	-0.0971185	-0.154076
232	-0.172159	-0.250172	-0.175494	-0.179643	-0.151485	-0.183893	-0.134078	-0.142475	-0.010048	-0.0411447	-0.196631	-0.247567	-0.0952875	-0.144126	-0.0697015	-0.134367
233	-0.151769	-0.225639	-0.156222	-0.156817	-0.139001	-0.159562	-0.11575	-0.117439	0.00319112	-0.0228471	-0.169362	-0.216249	-0.0810632	-0.120587	-0.0490306	-0.116053
234	-0.128695	-0.195336	-0.135943	-0.137205	-0.126605	-0.13654	-0.0985682	-0.0970597	0.0130222	-0.00649742	-0.135847	-0.187067	-0.0632655	-0.102707	-0.0299073	-0.0998744
235	-0.107541	-0.163528	-0.117616	-0.117731	-0.112289	-0.115707	-0.0831042	-0.0842667	0.0181339	-0.00389914	-0.108494	-0.161354	-0.0503031	-0.100929	-0.0273514	-0.0873052
236	-0.08662	-0.136127	-0.102685	-0.100379	-0.0954443	-0.096269	-0.0699313	-0.0727013	0.0239359	-0.00938941	-0.0855658	-0.139811	-0.0416574	-0.0985745	-0.0272394	-0.0805235
237	-0.0699867	-0.108739	-0.0857091	-0.0840631	-0.0801709	-0.0778921	-0.0558992	-0.0621185	0.0213737	-0.0140643	-0.0654506	-0.12106	-0.0315353	-0.0910013	-0.0312222	-0.0712567
238	-0.0559312	-0.0869733	-0.0694983	-0.0705553	-0.0729267	-0.0614265	-0.0447881	-0.0542884	0.0149885	-0.0138447	-0.0509461	-0.103885	-0.0226942	-0.0758962	-0.0273263	-0.0614411
239	-0.0454988	-0.0652589	-0.0555203	-0.0577276	-0.0638944	-0.0477996	-0.0350515	-0.0462782	0.0121355	-0.00946472	-0.0382131	-0.0887835	-0.015859	-0.058204	-0.0221918	-0.0455499
240	-0.034234	-0.0433252	-0.043605	-0.0471235	-0.054906	-0.0373874	-0.0286369	-0.0402859	0.00813589	-0.00288667	-0.0280133	-0.0746542	-0.00790304	-0.0418068	-0.0135026	-0.030755
K2D2 Prediction
Alpha Helix (%)	2.64	2.64	2.64	2.11	2.64	2.64	2.64	2.11	2.11	2.64	2.11	2.64	2.11	1.86	1.86	2.64
Beta Strand (%)	51.85	51.85	51.85	51.77	51.85	51.85	51.85	51.77	51.77	51.85	51.77	51.85	51.77	49.03	49.03	51.85
K2D3 Prediction
Alpha Helix (%)	2.61	2.55	2.29	2.27	2.31	2.27	2.3	1.82	2.31	2.34	1.79	2.55	2.44	4.5	2.64	2.61
Beta Strand (%)	23.22	23.52	24.86	25.67	24.27	24.96	24.87	25.92	25.97	24.21	26.65	23.28	25.35	19.46	22.74	23.44
